1 **A role for glutathione in buffering excess intracellular copper in *Streptococcus***  
2 ***pyogenes***

3

4 Louisa J. Stewart<sup>1\*</sup>, Cheryl-lynn Y. Ong<sup>2\*</sup>, May M. Zhang<sup>2</sup>, Stephan Brouwer<sup>2</sup>, Liam  
5 McIntyre<sup>3</sup>, Mark R. Davies<sup>3</sup>, Mark J. Walker<sup>2</sup>, Alastair G. McEwan<sup>2</sup>, Kevin J. Waldron<sup>4</sup>,  
6 Karrera Y. Djoko<sup>1</sup>

7

8 \*We consider that these authors have contributed equally to the work

9

10 <sup>1</sup>Department of Biosciences, Durham University, Durham DH1 3LE, United Kingdom

11 <sup>2</sup>School of Chemistry and Molecular Biosciences and Australian Infectious Diseases  
12 Research Centre, The University of Queensland, St Lucia, QLD 4072, Australia

13 <sup>3</sup>Department of Microbiology and Immunology, University of Melbourne, at the Peter Doherty  
14 Institute for Infection and Immunity, Melbourne, VIC 3000, Australia

15 <sup>4</sup>Biosciences Institute, Faculty of Medical Sciences, Framlington Place, Newcastle University,  
16 Newcastle upon Tyne, NE2 4HH, United Kingdom

17

18 **Corresponding author**

19 Mailing address: Department of Biosciences, Durham University, Durham DH1 3LE, United  
20 Kingdom

21 Phone: (+44) 191 334 0809

22 Email: [karrera.djoko@durham.ac.uk](mailto:karrera.djoko@durham.ac.uk)

23

24

25 Keywords: copper homeostasis, copper stress and tolerance, copper export, metal buffer,  
26 glutathione, Group A *Streptococcus*.

27 **ABSTRACT**

28

29 Copper (Cu) is an essential metal for bacterial physiology but in excess it is bacteriotoxic. To  
30 limit Cu levels in the cytoplasm, most bacteria possess a transcriptionally-responsive system  
31 for Cu export. In the Gram-positive human pathogen *Streptococcus pyogenes* (Group A  
32 *Streptococcus*, GAS), this system is encoded by the *copYAZ* operon. In this study, we  
33 demonstrate that the site of GAS infection *in vivo* represents a Cu-rich environment but  
34 inactivation of the *copA* Cu efflux gene does not reduce virulence in a mouse model of  
35 invasive disease. *In vitro*, Cu treatment leads to multiple observable phenotypes, including  
36 defects in growth and viability, decreased fermentation, inhibition of glyceraldehyde 3-  
37 phosphate dehydrogenase (GapA) activity, and misregulation of metal homeostasis, likely as  
38 a consequence of mismetalation of non-cognate metal-binding sites. Surprisingly, the onset of  
39 these effects is delayed by ~4 h even though expression of *copZ* is upregulated immediately  
40 upon exposure to Cu. We further show that the onset of all phenotypes coincides with  
41 depletion of intracellular glutathione (GSH). Supplementation with extracellular GSH  
42 replenishes the intracellular pool of this thiol and suppresses all the observable effects of Cu  
43 treatment. Our results indicate that GSH contributes to buffering of excess intracellular Cu  
44 when the transcriptionally-responsive Cu export system is overwhelmed. Thus, while the  
45 *copYAZ* operon is responsible for Cu *homeostasis*, GSH has a role in Cu *tolerance* that  
46 allows bacteria to maintain metabolism even in the presence of an excess of this metal ion.  
47 This study advances fundamental understanding of Cu handling in the bacterial cytoplasm.

48 **IMPORTANCE**

49

50 The control of intracellular metal availability is fundamental to bacterial physiology. In the case  
51 of copper (Cu), it is established that rising intracellular Cu levels eventually fill the metal-  
52 sensing site of the endogenous Cu-sensing transcriptional regulator, which in turn induces  
53 transcription of a copper export pump. This response caps intracellular Cu availability below a  
54 well-defined threshold and prevents Cu toxicity. Glutathione, abundant in many bacteria, is  
55 known to bind Cu and is long assumed to contribute to bacterial Cu handling. However, there  
56 is some ambiguity since neither its biosynthesis nor uptake is Cu-regulated. Furthermore,  
57 there is little experimental support for this role of glutathione beyond measurement of the  
58 effect of Cu on growth of glutathione-deficient mutants. Our work with Group A *Streptococcus*  
59 provides new evidence that glutathione increases the threshold of intracellular Cu availability  
60 that can be tolerated by bacteria and thus advances fundamental understanding of bacterial  
61 Cu handling.

## 62 INTRODUCTION

63

64 Bacteria have been exposed to environmental copper (Cu) since the Great Oxidation  
65 Event, when the rise in atmospheric O<sub>2</sub> levels led to solubilisation of Cu from minerals. There  
66 is evidence that recent evolution of plant, animal, and human pathogens has been influenced  
67 by the anthropogenic release of Cu into soils, for instance *via* mining activities and the legacy  
68 of using Cu salts and compounds in industrial-scale biocides (1). Bacteria also encounter  
69 elevated levels of Cu at microenvironments within a eukaryotic host. Bacterial predation  
70 induces an increase in intracellular Cu levels in protozoa (2) while phagocytosis stimulates  
71 uptake and accumulation of Cu in murine macrophages (3, 4). Studies of more complex  
72 animal models of infectious disease and human infections further suggest that infection  
73 triggers systemic changes in host Cu levels and that the specific sites of inflammation are  
74 usually, though not always, Cu-rich (5–9). The prevailing model that encompasses these  
75 observations suggests that Cu exerts a direct antibacterial action and/or supports the  
76 antibacterial function of innate immune cells (10).

77 Cu can be bacteriotoxic because it is a competitive metal for protein binding (11).  
78 Extracellular Cu invariably enters the bacterial cytoplasm *via* an uptake process that remains  
79 poorly understood. Once inside, Cu fills the available Cu-binding sites in proteins and other  
80 biomolecules, beginning with the tightest affinity and eventually associating with the weakest  
81 affinity sites. Within this hierarchy of binding sites are the allosteric sites in Cu-sensing  
82 transcriptional regulators, which, when metalated by Cu, activate expression of a Cu efflux  
83 pump (12). In undertaking this role, the Cu sensor and export pump together impose an upper  
84 threshold of Cu availability in the cytoplasm. They ensure that only native, stable, high-affinity  
85 Cu sites are metalated by Cu, and at the same time they prevent adventitious, non-specific,  
86 non-cognate, weaker-binding sites from becoming mismetalated. Such mismetalation events  
87 can inactivate key enzymes and, consequently, impair bacterial growth and viability (13–16).

88 Additional cytoplasmic components are thought to limit Cu availability by chelating or  
89 “buffering” this metal ion. These components include bacterial metallothioneins (17), copper  
90 storage proteins (18), and Cu-binding metallochaperones (19, 20), which are often, though  
91 not always, transcriptionally regulated by the endogenous Cu sensors. Mutant bacterial

92 strains lacking these proteins typically display a Cu-sensitive growth phenotype. Non-protein  
93 components, particularly the low molecular weight thiol glutathione (GSH), are also assumed  
94 to buffer Cu (21), although their uptake or biosynthesis is not transcriptionally induced in  
95 response to Cu treatment (15, 20, 22, 23). *In vitro*, addition of GSH protects purified  
96 metalloenzymes from inactivation by Cu (13). *In vivo*, growth of bacterial mutant strains that  
97 are impaired in GSH uptake (24) or biosynthesis (25–27) are all inhibited by added Cu,  
98 especially if the Cu efflux pump (25, 26) or Cu-binding metallochaperone (27) in the organism  
99 is also inactivated.

100         Beyond growth analysis, there is currently little experimental support for a role of GSH  
101 in buffering Cu in bacteria. Perhaps the clearest, albeit indirect, line of evidence was obtained  
102 using a  $\Delta gshB\Delta atx1$  mutant of *Synechocystis* lacking the GSH biosynthesis enzyme GshB  
103 and the cytoplasmic Cu-binding metallochaperone Atx1. This mutant failed to repress  
104 expression of Zn-regulated genes in response to elevated Zn (27). *In vitro* metal- and DNA-  
105 binding experiments (28) suggest that the absence of GSH and the metallochaperone leads  
106 to an increase in background Cu availability, which mismetalates the allosteric site of the Zn  
107 sensor Zur and thus interferes with Zn sensing.

108         Like most bacteria, Gram-positive human pathogen *Streptococcus pyogenes* (Group  
109 A *Streptococcus*, GAS) possesses a system for Cu sensing and efflux, which is encoded by  
110 the *copYAZ* operon (29). In this work, we examine whether *copA*, encoding the Cu-effluxing  
111 P<sub>1B-1</sub>-type ATPase, plays a critical role in GAS pathogenesis, as demonstrated for other  
112 bacterial pathogens (7, 30–32). We show that GAS occupies a Cu-rich environment during  
113 infection of a mouse model of invasive disease, and yet inactivation of *copA* does not  
114 significantly reduce GAS virulence. This unexpected observation leads us to investigate the  
115 effects of Cu treatment on the cellular biochemistry and physiology of GAS. The results  
116 provide key insights into the importance of GSH in cytoplasmic Cu buffering to supplement  
117 the transcriptionally-responsive Cu sensing and efflux system. This additional buffering  
118 extends the range of intracellular Cu concentrations that can be tolerated by bacteria, and  
119 thus prevents a sudden or abrupt transition from Cu homeostasis to Cu stress upon exposure  
120 to an excess of this metal ion.

121

## 122 RESULTS

123

124 **Initial characterisation of a  $\Delta copA$  mutant.** The *copYAZ* operon in GAS has been  
125 previously shown to resemble other Cop systems in Gram-positive bacteria (29) (Supporting  
126 Figure 1A). Consistent with a role in Cu efflux, expression of this operon functionally  
127 complemented a heterologous *Escherichia coli*  $\Delta copA$  mutant strain (29). Our *in silico*  
128 analyses found one additional open reading frame downstream of *copZ* (Supporting Figure  
129 1A). It encodes a small, uncharacterised protein (56 amino acids) with an N-terminal  
130 transmembrane domain, a putative metal-binding C-X<sub>3</sub>-M-H motif at the C-terminus, and no  
131 known homologue. This gene is absent from *copYAZ* operons in other Gram-positive bacteria  
132 and its function in Cu homeostasis is unknown.

133 For the present study, we constructed a non-polar  $\Delta copA$  mutant of GAS M1T1 strain  
134 5448. This mutation did not alter basal expression of downstream *cop* genes (Supporting  
135 Figure 1B(i)). As anticipated, the  $\Delta copA$  mutant was more susceptible to growth inhibition by  
136 added Cu than was the wild type (Supporting Figure 1C). This mutant also accumulated  
137 higher levels of intracellular Cu (Supporting Figure 1D), leading to increased expression of the  
138 other *cop* genes when compared with the wild type (Supporting Figure 1B(ii)). Marker rescue  
139 (*copA*<sup>+</sup>) restored both the expression of *copA* and the wild type phenotype (Supporting  
140 Figures 1B-D).

141

142 **Deletion of *copA* does not lead to a loss of virulence in a mouse model of**  
143 **infection.** To determine if the Cop system and interactions with host Cu have an effect on  
144 GAS pathogenesis, we employed an established invasive disease model using transgenic  
145 human-plasminogenised mice (33). Mice subcutaneously infected with wild type GAS  
146 developed ulcerative skin lesions at the site of injection after 1 day. These lesions were  
147 excised 3 days post-infection and were found to contain more Cu than adjacent healthy skin  
148 or skin from uninfected mice (Figure 1A). Consistent with these results, the *copYAZ* operon  
149 was upregulated in GAS isolated from infected mouse tissues when compared with those  
150 grown in THY medium (34). There was also an increase in Cu levels in mouse blood after 3  
151 days of infection (Figure 1B). Notably, these Cu levels in the blood are comparable to those

152 measured in the serum of mice infected with the fungal pathogen *Candida albicans* or the  
153 parasite *Plasmodium berghei* (5). These observations support a model where redistribution of  
154 host Cu is a feature of the general immune response to infection (5).

155 Comparing the survival of mice post-infection, no statistically significant difference  
156 was observed whether mice were infected with wild type or the  $\Delta copA$  mutant ( $P = 0.0991$ ;  
157 Figure 1C). Although no single animal model can fully represent the complex features of  
158 human streptococcal diseases (35), consistent with *in vivo* findings, the  $\Delta copA$  mutant was no  
159 more susceptible to killing by human neutrophils when compared with the wild type or *copA*<sup>+</sup>  
160 mutant strains in an *ex vivo* infection assay (Figure 1D). In addition, recent reports did *not*  
161 identify the *cop* genes to be fitness determinants during *ex vivo* infection of human blood (36)  
162 or *in vivo* soft tissue infection in mice (37). These results imply that, despite the systemic and  
163 niche-specific elevated levels of host Cu, the Cu efflux pump CopA is not essential for GAS  
164 virulence in this model.

165

166 **Cu treatment leads to defects in the late exponential phase of growth.** The lack  
167 of a virulence defect for the  $\Delta copA$  mutant *in vivo* prompted us to examine the impact of Cu  
168 treatment on GAS physiology *in vitro*. Addition of Cu (up to 10  $\mu$ M) to the culture medium did  
169 not affect the doubling time of the  $\Delta copA$  mutant during the exponential phase of growth but it  
170 did reduce the final culture yield (Figure 2A, Supporting Figures 2A-B). This phenotype was  
171 reproduced during growth in the presence of glucose or alternative carbon sources  
172 (Supporting Figure 2C). In each condition, growth of Cu-treated cultures ceased upon  
173 reaching approximately the same OD<sub>600</sub> (~0.35) regardless of growth rate, indicating that the  
174 growth defect was related to bacterial cell numbers and/or growth stage. Consistent with this  
175 interpretation, Cu treatment did not affect growth in the presence of mannose (Supporting  
176 Figures 2C) or limiting amounts of glucose (Supporting Figures 2D), since neither  
177 experimental condition supported growth of GAS beyond OD<sub>600</sub> ~0.35.

178 Parallel assessments of plating efficiency and total ATP levels confirmed that  
179 differences between Cu-treated and untreated cultures appeared only in the late exponential  
180 or early stationary phase of growth (after ~4 h when grown in the presence of glucose;

181 Figures 2B-C). There were clear decreases in the plating efficiency and ATP production by  
182 Cu-treated  $\Delta copA$  cultures during this period when compared with the untreated control.

183

184 **Cu treatment leads to metabolic arrest in the late exponential phase of growth.**

185 GAS is a lactic acid bacterium. Under our experimental conditions, this organism carried out  
186 homolactic fermentation and generated lactic acid as the major end product (Supporting  
187 Figures 3A-B). However, we noted that Cu-treated  $\Delta copA$  cultures did not acidify the growth  
188 medium (Supporting Figure 3C). Hence, we hypothesised that Cu treatment impairs  
189 fermentation in GAS.

190 Consistent with this proposal, Cu-treated  $\Delta copA$  cultures produced ~50% less lactic  
191 acid and consumed ~50% less glucose when compared with the untreated control (Figure 3A,  
192 Supporting Figures 3B(i)-(ii)). Pyruvate production remained unaltered (Supporting Figure  
193 3B(iii)). There is no evidence of a shift towards mixed-acid fermentation since the reduction in  
194 lactate levels was not accompanied by a concomitant increase in acetate levels (Supporting  
195 Figure 3B(iv)). The levels of ethanol were undetectable (detection limit ~0.2 mM).

196 Differences in lactate production between Cu-treated and untreated  $\Delta copA$  cultures  
197 appeared, again, only after ~4 h of growth (Figure 3A). While our methods are not sufficiently  
198 sensitive to detect small changes in glucose levels at earlier time points, it is clear that Cu-  
199 treated  $\Delta copA$  cultures did not consume glucose beyond  $t \sim 4$  h (Supporting Figure 3D(i)).  
200 Pyruvate production was, again, not affected at any time point (Supporting Figure 3D(ii)).  
201 These results suggest that Cu treatment leads to defects in metabolism but only after entry  
202 into the late exponential phase of growth.

203

204 **Cu treatment results in a loss in GapA activity in the late exponential phase of**

205 **growth.** The loss in lactate production, but not pyruvate, implies that lactate dehydrogenase  
206 (Ldh) is inactivated (Figure 3B). To test this proposal, we cultured GAS in the absence or  
207 presence of added Cu for 4 h, prepared whole cell extracts, and measured Ldh activity.  
208 Figures 3C(i) and 3D(i) show that Ldh remained active in all strains, regardless of Cu  
209 treatment (0, 1, or 5  $\mu$ M of added Cu).



210           What, then, is the target of Cu intoxication in GAS? This bacterium does not possess  
211 a TCA cycle or the biosynthesis pathways for multiple amino acids, vitamins, and cofactors  
212 (e.g. heme). Thus, it lacks obvious candidate iron-sulfur cluster enzymes that are destabilised  
213 by excess Cu ions in other systems (13). In an attempt to develop a molecular explanation for  
214 the loss in fermentation, we examined the activity of the two GAPDH enzymes in GAS,  
215 namely the classical, phosphorylating, ATP-generating GapA and the alternative, non-  
216 phosphorylating GapN (Figure 3B). GapA has been identified as a target of Ag and Cu  
217 poisoning in *E. coli* (38) and *Staphylococcus aureus* (39), respectively, and as such, it is a  
218 likely candidate for Cu poisoning in GAS. As expected, Cu treatment (both 1 and 5  $\mu$ M of  
219 added Cu) led to a decrease in GapA activity in  $\Delta copA$  mutant cells (Figures 3C(ii), 3D(ii)),  
220 which would explain the corresponding reduction in lactate secretion (Figure 3A) and ATP  
221 production (Figure 2C). The reduction in GapA activity would also cause upstream glycolytic  
222 precursors to accumulate, with consequent feedback inhibition of downstream enzymes (40),  
223 as well as glucose phosphorylation and uptake (41, 42) (Supporting Figures 3B(ii), 3D(i)).

224           This Cu-dependent inhibition is specific to GapA since there was no reduction in  
225 GapN activity (Figures 3C(iii), 3D(iii)). Given that there was no detectable change in GapA  
226 protein levels in cell extracts (Supporting Figure 4A), these observations are consistent with  
227 mismetalation of GapA, as established recently for the GapA homologue in *S. aureus* (39).  
228 The excess Cu ions likely bind to the conserved Cys and His residues at the catalytic site  
229 (Supporting Figure 4B), as suggested previously for the binding of Ag ions to GapA from *E.*  
230 *coli* (38).

231           Remarkably, when cultures were sampled earlier (at  $t = 2$  and  $3$  h), no difference was  
232 observed between GapA activity in Cu-treated and control  $\Delta copA$  cells (Figures 3E). The  
233 timing of GapA inhibition, i.e. at the onset of the late exponential phase of growth (at  $t = 4$  h;  
234 Figure 3E), coincided with the arrest in bacterial growth and metabolism, supporting our  
235 hypothesis that GapA is a key target of Cu intoxication in GAS.

236

237           **Cu treatment leads to misregulation of metal homeostasis in late exponential**  
238 **phase of growth.** The puzzling but consistent, 4-hour delay in the onset of all observable  
239 phenotypes led us to hypothesise that there was a time-dependent shift in Cu handling by

240 GAS. To test this proposal, we measured the response of the Cu sensor CopY by monitoring  
241 expression of *copZ* during growth in the presence of the lowest inhibitory concentration of  
242 added Cu (0.5  $\mu$ M; see Supporting Figure 2A(ii)). The results show that *copZ* transcription  
243 was upregulated  $\sim$ 4-fold immediately upon Cu exposure ( $t = 0$  h, in which  $\sim$ 12 min passed  
244 between addition of Cu into the culture, centrifugation, and addition of lysis buffer; Figure 4A).  
245 This level of upregulation remained largely unchanged during growth (measured up to 5 h;  
246 Figure 4A), even though intracellular Cu levels continued to rise (Supporting Figure 5). Our  
247 interpretation of these results is that the CopY sensor was fully metalated and expression of  
248 *copZ* was already at (or near) its maximum at  $t = 0$  h post-challenge with added Cu. These  
249 data also establish that the *copYAZ* operon is transcriptionally induced before the onset of  
250 observable growth defects (hereafter referred to as Cu “stress”).

251 We concurrently measured the expression of genes that are controlled by other  
252 metalloregulators, namely *adcAII* (regulated by AdcR, a MarR-family Zn-sensing  
253 transcriptional co-repressor (43)), *siaA* (controlled by MtsR, a DtxR-family Mn/Fe-sensing co-  
254 repressor (44)), and *cadD* (regulated by CadC, an ArsR-family Zn/Cd-sensing derepressor  
255 (45)). Clear changes in the expression levels of all three genes were detected in response to  
256 Cu treatment. While *adcAII* and *siaA* were downregulated, *cadD* was upregulated (Figures  
257 4B-D). Each of these transcriptional responses is consistent with metalation of the  
258 corresponding metallosensor (Figures 4B-D), but whether by the cognate metal or by Cu  
259 cannot be distinguished *in vivo*. Nevertheless, the hypothesised effect of Cu on these  
260 metallosensors was corroborated by results from genome-wide RNA-seq analyses. Multiple  
261 AdcR- and MtsR-controlled genes were negatively regulated, while both the CadC-controlled  
262 genes were positively regulated in response to 5  $\mu$ M of added Cu (Table 1, Supporting Table  
263 1). Interestingly, no clear effect on *gczA* or *czcD* expression was detected, suggesting that the  
264 metalation status of GczA, a TetR-family Zn-sensing derepressor (46), is not altered by Cu  
265 treatment.

266 Crucially, changes in the expression of *adcAII*, *siaA*, and *cadD* appeared only after  $\sim$ 4  
267 h of growth (Figures 4B-D). These transcriptional changes were not accompanied by  
268 increases in total intracellular Zn, Mn, or Fe levels (Supporting Figure 5). Thus, the simplest  
269 model that accounts for the sudden metalation (or mismetalation) of multiple metallosensors,

270 as well as GapA, is that excess Cu is released from an intracellular buffer, leading to  
271 mislocation of Cu to adventitious binding sites and/or redistribution of intracellular metals.

272

273 **The onset of the Cu stress phenotype coincides with depletion of GSH.** What  
274 comprises the intracellular buffer for excess Cu in GAS? This organism does not possess a  
275 homologue of the metallothionein MymT (17) or the Cu storage protein Csp (47). Instead, this  
276 buffer likely consists of a polydisperse mixture of cytoplasmic small molecules or metabolites  
277 (48). Noting that GAS is auxotrophic for most nutrients, including multiple amino acids,  
278 vitamins, nucleobases, and GSH, we hypothesised that: (i) one or more of these nutrients  
279 constitute the intracellular Cu buffer, either directly by coordinating Cu or indirectly by acting  
280 as a synthetic precursor to the buffer; and that (ii) these nutrients become exhausted from the  
281 extracellular medium during bacterial growth, leading to the observable effects of Cu stress.

282 We tested this hypothesis using two complementary approaches and the results  
283 identify GSH as the key limiting nutrient. First, mass spectrometry was employed to measure  
284 consumption of nutrients from the growth medium. Several amino acids, the nucleobases  
285 adenine and uracil, as well as GSH (and/or its disulfide GSSG) were nearly or completely  
286 spent after ~4 h of growth (Supporting Figure 6). Cys and its disulfide were below detection  
287 limits. Next, the culture medium was supplemented with each or a combination of the spent or  
288 undetected extracellular nutrients. Their ability to restore growth of the  $\Delta copA$  mutant in the  
289 presence of added Cu was subsequently examined. Only supplementation with GSH was  
290 strongly protective against Cu intoxication (Supporting Figure 7).

291 The GAS genome encodes neither the common pathway for GSH biosynthesis  
292 (GshAB) nor the bifunctional glutathione synthetase (GshF (49)). Instead, an uncharacterised  
293 homologue of the GSH-binding solute-binding protein GshT is present (Supporting Figure 8).  
294 GshT, in conjunction with the endogenous cystine importer TcyBC, likely allows GAS to  
295 import extracellular GSH ( $\gamma$ -Glu-Cys-Gly) into the cytoplasm (50). This system may also  
296 transport  $\gamma$ -Glu-Cys or Cys-Gly (50), but addition of these dipeptides, or Cys alone, or a  
297 mixture of the amino acids Glu, Cys, and Gly did not improve growth of Cu-treated  $\Delta copA$   
298 mutant cultures (Figure 5A). Altogether, these results suggest that: (i) the protective effect of  
299 GSH is unlikely to result from chelation of *extracellular* Cu ions by thiophilic ligands; (ii)

300 extracellular GSH is depleted during growth of GAS; and (iii) this depletion is responsible for  
301 the observable Cu stress phenotypes. Consistent with propositions (ii) and (iii), addition of  
302 GSH completely suppressed the effects of Cu treatment and restored plating efficiency, as  
303 well as glucose consumption, lactate secretion, and ATP production beyond the late  
304 exponential phase of growth (Figures 5B-E).

305

306 **GSH contributes to buffering of excess intracellular Cu.** The time-dependent  
307 reduction in extracellular GSH levels (Supporting Figure 6D) was mirrored by a decrease in  
308 intracellular GSH (Figure 6A). Both the wild type and  $\Delta copA$  mutant strains contained ~4 mM  
309 of intracellular GSH (and GSSG) at  $t = 0$  h (Figure 6A). This amount was likely already  
310 present in the inoculum, which was cultivated in the complex medium THY ( $[GSH]_{THY} \sim 30 \mu M$   
311 (51)). Intracellular GSH levels in both strains reduced to ~0.1 mM at  $t = 4$  h, regardless of Cu  
312 treatment (Figures 6A-B). This decrease occurred presumably as a consequence of bacterial  
313 growth and replication in a chemically defined medium with a limited extracellular supply of  
314 this thiol ( $[GSH]_{CDM} \sim 0.5 \mu M$ ; Supporting Figure 6D). This low amount of GSH coincided with  
315 the onset of the observable Cu stress phenotypes. It might also explain why cultures that  
316 grew to low  $OD_{600}$  values displayed no sign of Cu stress (Supporting Figures 2C-D) – these  
317 cultures likely had not depleted their intracellular GSH supply.

318 We noted that Cu treatment did not transcriptionally induce the uptake of GSH.  
319 Levels of *gshT* transcripts remained largely unchanged, based on RNA-seq analyses of  
320  $\Delta copA$  cells at the late-exponential phase of growth (Table 1). This result supports previous  
321 transcriptomic studies in several Gram-positive and Gram-negative bacteria, none of which  
322 identified GSH biosynthesis or uptake as a key transcriptional response to Cu treatment (15,  
323 20, 22, 23).

324 Supplementation of the growth medium with GSH (0.1 mM) did not affect the  
325 intracellular levels of this thiol at the early stages of growth ( $t = 0$  and 2 h; Figure 6B).  
326 However, it did allow  $\Delta copA$  cells to maintain intracellular concentrations of this tripeptide at  
327 ~1 mM (one log unit higher than unsupplemented cells) beyond the late exponential growth  
328 phase, regardless of Cu treatment (Figure 6B). As mentioned earlier, these GSH-treated cells  
329 were Cu-tolerant (Figure 5).

330 A more detailed examination of GSH-supplemented  $\Delta copA$  cells revealed that GapA  
331 was protected from inactivation by added Cu (Figure 6C). In addition, the Cu-induced, time-  
332 dependent changes in *cadD* and *adcAII* expression were abolished (Figure 6D), suggesting  
333 that CadC and AdcR were protected from mismetalation. We continued to observe some  
334 downregulation of *siaA* transcription, albeit to a lesser magnitude when compared with GSH-  
335 deplete cultures (Figure 6D vs. Figure 4D). In general, these results support a model whereby  
336 GSH constitutes the major buffer for excess intracellular Cu in GAS and protects potential  
337 non-cognate binding sites from becoming (mis)metalated by Cu.

338 Importantly, GSH supplementation did not affect expression of *copZ* at low  
339 concentrations of added Cu (0 – 500 nM; Figure 6E). This observation is consistent with the  
340 proposal that GSH does not rescue the  $\Delta copA$  mutant simply by chelating extracellular Cu  
341 ions. However, GSH treatment did partially suppress *copZ* expression in response to a high  
342 concentration of added Cu (1000 nM; Figure 6E). This observation indicates the relative  
343 buffering strengths of GSH and CopY, which are discussed below.

344

## 345 DISCUSSION

346

347 **The role of GSH in buffering of excess cytoplasmic Cu.** GSH has been proposed  
348 to bind Cu by assembling a stable, tetranuclear  $Cu_4GS_6$  cluster (52). In such a model, when  
349 present at low millimolar concentrations (e.g. ~4 mM in GAS at  $t = 0$  h, see Figure 6A), GSH  
350 would bind Cu with an apparent affinity of  $K_D = 10^{-16.7}$  M and thus would impose a threshold of  
351 Cu availability at  $10^{-16.7}$  M (Supporting Figure 9A). This threshold is above the range of Cu  
352 availability set by most bacterial Cu sensors (Supporting Figure 9B) (53–55). Therefore, GSH  
353 contributes to Cu buffering only when the transcriptionally-responsive Cu homeostasis system  
354 is impaired (e.g. in a  $\Delta copA$  mutant (25, 26)) or overwhelmed (e.g. when intracellular Cu  
355 levels rise above the responsive range of the Cu sensors).

356 Figure 6E shows that supplementation with GSH had little impact on metalation of  
357 CopY (and thus expression of *copZ*) when the amounts of added Cu were low. However,  
358 GSH appeared to dampen the CopY response at higher concentrations of added Cu,  
359 indicating that this thiol competes with CopY for binding Cu when intracellular Cu levels are

360 high. Hence, the thresholds of intracellular Cu availability set by GSH and CopY may overlap,  
361 at least partially, with GSH being the weaker buffer (52, 55, 56). The model in Supporting  
362 Figure 9B is compatible with these experimental data but it will need refinement. This model  
363 was estimated using known parameters (Cu affinity, DNA affinity, number of DNA targets) for  
364 CopY from *S. pneumoniae* (CopY<sub>Spn</sub>) (55), but CopY<sub>Spn</sub> differs from CopY<sub>GAS</sub> in several key  
365 aspects. CopY<sub>Spn</sub> lacks one of the two Cys-X-Cys motifs found in other CopY homologues  
366 such as CopY<sub>GAS</sub> and CopY from *E. hirae* (CopY<sub>EH</sub>) (Supporting Figure 10). CopY<sub>Spn</sub> binds 2  
367 Cu atoms per dimer in a solvent-exposed centre while CopY<sub>EH</sub> binds 4 Cu atoms per  
368 functional dimer and assembles a solvent-occluded centre (55, 57). In addition, two *cop*  
369 boxes are present in *S. pneumoniae* (58) while only one is found in GAS. How these  
370 differences shift the threshold model will need to be examined using careful *in vitro* studies  
371 with purified proteins and DNA. In the simplest scenario, an increase in the stability (affinity)  
372 of the bound Cu atoms in CopY, which may occur as a consequence of coordination by extra  
373 Cys ligands, would lower the threshold of Cu availability set by CopY (Supporting Figure 9C),  
374 and thus better fit our experimental data.

375         Depletion of intracellular GSH to 0.1 mM at the late exponential phase of growth  
376 would weaken its buffering capacity by at least 2 log units (Supporting Figure 9A). Figure 4  
377 shows that Cu is then able to metalate non-specific binding sites in non-cognate  
378 metallosensors or metalloenzymes. Our results further suggest that AdcR, CadC, and MtsR  
379 can allosterically respond to Cu and differentially regulate expression of their target genes *in*  
380 *vivo*. Precisely how this occurs will need to be confirmed with purified proteins *in vitro*. Cu-  
381 responsive regulation of genes under control of non-cognate metallosensors has indeed been  
382 reported both *in vivo* and *in vitro*, although not for the families of regulators described here  
383 (15, 28, 59–61).

384         Not all bacteria use GSH as the major cytoplasmic thiol. Some bacilli, such as *B.*  
385 *subtilis* and *S. aureus*, produce the glycoside bacillithiol (BSH) instead. The affinity of BSH to  
386 Cu is at least 2 orders of magnitudes tighter than that of GSH (56, 62). Hence, BSH likely  
387 imposes a lower limit on cytoplasmic Cu availability than does GSH but it is worth noting that  
388 its intracellular level is ~30 times lower than that of GSH (63). Importantly, the relative order  
389 with the endogenous Cu sensor CsoR still holds, with BSH binding Cu at least 3 log units

390 more weakly than does CsoR (54). Indeed, this thiol is also thought to contribute to Cu  
391 homeostasis by buffering excess Cu. Deletion of the *B. subtilis bshC* gene for BSH  
392 biosynthesis led to a slight increase in *copZ* expression in response to added Cu. This result  
393 mirrors our finding in Figure 6E and suggests that the Cu sensor CsoR is more readily  
394 metalated by Cu in the absence of the major buffering thiol (64). It is also notable that the  
395 identification of GapA as a major reservoir of excess Cu ions in the cytoplasm was in a strain  
396 of *S. aureus* that does not synthesise BSH (39).

397 In summary, this study provides a new line of evidence that Cu handling in the  
398 bacterial cytoplasm, when formulated using the threshold model, comprises two components  
399 (Figure 7). The transcriptionally-responsive component, which includes the Cu sensor, Cu  
400 efflux pump, and additional Cu-binding metallochaperones, functions in housekeeping or  
401 *homeostasis*, and sets a low limit of Cu availability in the cytoplasm. Rising Cu levels can  
402 saturate this homeostasis system and sudden Cu shock can overwhelm it, but the  
403 transcriptionally-unresponsive component, in this case GSH, buffers the excess Cu and  
404 confers additional Cu *tolerance*. This second system acts as the final layer of protection  
405 before cells experience widespread mismetalation and, therefore, Cu *stress* (Figure 7). This  
406 additional buffering essentially extends the range of cytoplasmic Cu availability that can be  
407 tolerated by bacteria, allows bacteria to maintain key cellular functions, and thus prevents an  
408 abrupt transition from Cu homeostasis to Cu stress upon exposure to an excess of this metal  
409 ion.

410

#### 411 **The role of GSH in buffering bacterial Cu during host-pathogen interactions.**

412 This study was conducted originally to examine the role of the Cop Cu homeostasis system in  
413 GAS pathogenesis. Although GAS occupied a Cu-rich environment in mice (Figure 1A),  
414 inactivation of the *copA* gene did not lead to a reduction in GAS virulence (Figure 1C). Our *in*  
415 *vitro* investigations now suggest that GAS may withstand host-imposed increases in Cu  
416 levels, as long as it has access to a source of GSH *in vivo*. Indeed, we did detect the  
417 presence of GSH in the skin ulcers of infected mice, but interestingly, the amount was ~25-  
418 fold less when compared with skin from healthy mice or healthy skin from infected mice  
419 (Supporting Figure 11). Whether this depletion of GSH is a feature of the general host



420 immune response, a consequence of inflammation and/or host tissue necrosis, or a  
421 consequence of GAS metabolism is not known. Nevertheless, the virulence of the  $\Delta copA$   
422 mutant implies that the level of host GSH, albeit reduced, can support Cu buffering inside the  
423 GAS cytoplasm. Alternatively, the level of host Cu (Figure 1A) may not be sufficient to  
424 overwhelm the Cop homeostasis system, since the *copYAZ* operon was only slightly  
425 upregulated in bacteria isolated from mouse ulcers (average  $\log_2FC = 1.13$  vs. THY) (34).

426

427 **The link between the failure to buffer Cu and redox stress.** Under our  
428 experimental conditions, untreated  $\Delta copA$  cells contained 20,000 ( $\pm 3,000$ ) Cu atoms when  
429 sampled at  $t = 3$  h (before the onset of Cu stress). Cu treatment increased this number  $\sim 10$ -  
430 fold to 190,000 ( $\pm 130,000$ ) atoms (Supporting Figure 5). The intracellular GSH concentrations  
431 at the same time point ( $[GSH]_i = 0.76$  mM, Figure 6A) would translate to  $\sim 500,000$  molecules  
432 of GSH, which are clearly insufficient to buffer all of the intracellular Cu ions. Yet, there was  
433 no observable Cu stress phenotype at this time point, suggesting that the excess Cu remains  
434 bound to other cytoplasmic component(s). These components may include CopZ and/or the  
435 novel, uncharacterised protein CopX (Supporting Figure 1A). This idea will be the focus of  
436 future studies.

437 Finally, the GSH/GSSG couple is the major redox buffer of the cell. Assuming that the  
438 GSH/GSSG ratio remains unchanged, depletion of intracellular GSH in GAS from  $\sim 4$  mM to  
439  $\sim 0.1$  mM would raise the cytoplasmic redox mid-potential by  $\sim 46$  mV. This relatively more  
440 oxidising environment, when combined with a lack of Cu buffering, may promote Cu-catalysed  
441 generation of reactive oxygen species (65) or formation of disulfides (66). Yet, our RNA-seq  
442 results do not suggest widespread oxidative stress (Supporting Table 1). In *E. coli*, deletion of  
443 *gshA* did not accelerate DNA damage in Cu-replete cells, even in the presence of added  $H_2O_2$   
444 (67). Similarly, proteomic analyses of a non-BSH producing strain of *S. aureus*, indicated that  
445 Cu-treatment does not induce a strong oxidative stress response in this organism (39).

446 Regardless of the relative importance of mismetalation vs. redox stress, our work  
447 demonstrates that excess Cu is not bacteriotoxic as long as cytoplasmic GSH is abundant  
448 and thus able to buffer the excess of this metal ion (Figure 7). In GAS, a GSH auxotroph, this  
449 intracellular buffer is dynamic; its levels change during bacterial growth and/or in response to



450 extracellular GSH availability. Future studies should take these effects into account when  
451 examining the impact of Cu treatment on bacterial cultures. Had our work not identified the 4  
452 h time point as metabolically relevant, sampling cultures 1 h earlier would have led to a  
453 different conclusion.

454

## 455 **METHODS**

456

457 **Data presentation and statistical analyses.** We follow recent recommendations  
458 regarding transparency in data representation (68, 69). Except for growth curves, individual  
459 data points from independent experiments are plotted, with shaded columns representing the  
460 means, and error bars representing standard deviations. Growth curves show the means of  
461 independent experiments, with shaded regions representing standard deviations. The number  
462 of independent experiments is stated clearly in each figure legend. Statistical analyses have  
463 been performed on all numerical data but *P* values are displayed on plots only if they aid in  
464 rapid, visual interpretation. Otherwise, *P* values for key comparisons are stated in the figure  
465 legends. Unless otherwise stated, statistical tests used two-way ANOVA using the statistical  
466 package in GraphPad Prism 8.0. All analyses were corrected for multiple comparisons.

467 **Ethics statement.** Animal experiments were conducted according to the Guidelines  
468 for the Care and Use of Laboratory Animals (National Health and Medical Research Council,  
469 Australia) and were approved by the University of Queensland Animal Ethics Committee  
470 (Australia). Human blood donation for use in neutrophil killing studies was conducted in  
471 accordance with the National Statement on Ethical Conduct in Human Research and in  
472 compliance with the regulations governing experimentation on humans, and was approved by  
473 the University of Queensland Medical Research Ethics Committee (Australia).

474 **Reagents.** All reagents were of analytical grade and obtained from Sigma or Melford  
475 Chemicals unless otherwise indicated.  $\gamma$ -Glu-Cys and Cys-Gly were from BACHEM Peptides  
476 (Germany). The sulfate and chloride salts of copper were used interchangeably. All reagents  
477 were prepared in deionised water.

478 **Strains and culture conditions.** GAS M1T1 5448 strains were propagated from  
479 frozen glycerol stocks onto solid THY medium without any antibiotics. Unless otherwise

480 indicated, liquid cultures were prepared in a chemically defined medium containing glucose as  
481 the carbon source (CDM-Glucose; Supporting Table 2). This medium routinely contained 53  
482 nM basal Cu, 155 nM Zn, 66 nM Fe, 9 nM Mn, 29 nM Co, and 23 nM Ni, as determined by  
483 ICP MS. All solid and liquid growth media contained catalase (50 µg/mL).

484 **Construction of mutants.** Non-polar GAS mutant strains were constructed by allelic  
485 exchange following standard protocols (70). Primers and plasmids used in this study are  
486 listed in Supporting Tables 3 and 4, respectively. All constructs and genetically altered strains  
487 were confirmed by PCR and Sanger sequencing.

488 **Mice virulence assays.** Transgenic, human plasminogenised *AlbPLG1* mice  
489 heterozygous for the human transgene were backcrossed greater than  $n = 6$  with C57BL/J6  
490 mice as described previously (71). GAS was prepared to obtain the target dose in the  $10^7$   
491 CFU range (WT  $1.8 \times 10^7$ ,  $\Delta copA$   $1.5 \times 10^7$ ) immediately prior to injection. Mice were  
492 subcutaneously infected ( $n = 10$ ) and virulence was determined by observing survival for 10  
493 days post-infection. Metal levels in mouse blood and skin were measured by ICP MS as  
494 described previously (72).

495 To assess GSH levels at the site of infection, mouse skin and infected lesions were  
496 excised 3 days post-infection, washed with PBS, resuspended in 1 mL PBS, homogenised in  
497 Lysing Matrix F tubes using a FastPrep 24G instrument (MP Biomedicals, 4°C, speed 6, 40 s,  
498 2 cycles), and centrifuged (10,000 x  $g$ , 5 min, 4°C). Total GSH was measured from the  
499 supernatant using the GSH-Glo kit (Promega) following manufacturer's instructions, with the  
500 modification of mixing undiluted samples 1:1 with 2 mM of tris(2-carboxyethyl)phosphine  
501 (TCEP) immediately prior to use.

502 **Neutrophil killing assays.** Survival of GAS following incubation with human  
503 neutrophils *ex vivo* was assayed at a multiplicity of infection of 10:1 as previously described  
504 (71).

505 **Bacterial growth.** Growth was assessed at 37°C in flat-bottomed 96-well plates  
506 using an automated microplate shaker and reader. Each well contained 200 µL of culture.  
507 Each plate was sealed with a gas permeable, optically clear membrane (Diversified Biotech).  
508  $OD_{600}$  values were measured every 20 min for 12 h. The plates were shaken at 200 rpm for 1

509 min in the double orbital mode immediately before each reading. OD<sub>600</sub> values were not  
510 corrected for path length (ca. 0.58 cm for a 200 µL culture).

511 **Plating efficiency.** GAS was cultured in 96-well plates as described earlier for growth  
512 analysis, sampled at the indicated time points, vortexed for 30 s, diluted serially in PBS, and  
513 plated onto solid THY medium without any antibiotics. Colony forming units (CFUs) were  
514 enumerated after overnight incubation at 37°C.

515 **ATP levels.** GAS was cultured in 96-well plates as described earlier for growth  
516 analysis and sampled at the indicated time points. The amount of total ATP in each sample  
517 was determined immediately using the BacTiter-Glo kit (Promega).

518 **Intracellular metal content.** GAS was cultured in 10 – 500 mL of CDM-Glucose as  
519 required (larger volumes were required to obtain enough biomass at earlier time points). At  
520 the desired time points, an aliquot was collected for the measurement of OD<sub>600</sub> or plating  
521 efficiency. The remaining cultures were harvested (5,000 x g, 4°C, 10 min), washed once with  
522 PBS containing EDTA (1 mM) and twice with ice-cold PBS. The final pellet was dissolved in  
523 concentrated nitric acid (150 µL, 80°C, 1 h) and diluted to 10 mL with deionised water. Total  
524 metal levels were determined by ICP MS. The results were normalised to OD<sub>600</sub> values or  
525 plating efficiency as indicated in the figure legends.

526 **Fermentation end products.** GAS was cultured in 96-well plates as described earlier  
527 for growth analysis. At the desired time points, samples were centrifuged (5,000 x g, 4°C, 10  
528 min) and the supernatants were frozen at -20°C until further use. Concentrations of pyruvate,  
529 lactate, acetate, and ethanol in the spent culture media were determined using K-PYRUV,  
530 K-LATE, K-ACET, and K-ETOH kits (Megazyme), respectively. Concentrations of glucose  
531 were determined using the GAGO20 kit (Sigma).

532 **Enzyme activity.** GAS was cultured in 40 – 250 mL of CDM-glucose as required  
533 (larger volumes were required to obtain enough biomass at earlier time points). At the desired  
534 time points, bacteria were harvested (5,000 x g, 4°C, 10 min), washed once with PBS, and  
535 frozen at -20°C until further use. Bacterial pellets were resuspended in a buffer containing  
536 sodium phosphate (100 mM) and triethanolamine (80 mM) at pH 7.4, transferred to a tube  
537 containing Lysing Matrix B (MP Biomedicals), and lysed in a FastPrep 24G instrument (MP

538 Biomedicals, 10 m/s, 20 s, 2 cycles). Cell debris were removed by centrifugation (20,000 x g,  
539 1 min). The cell-free lysate supernatant was kept on ice and used immediately.

540 To determine GapA activity, the reaction mixture contained NAD<sup>+</sup> (4 mM),  
541 *DL*-glyceraldehyde-3-phosphate (G3P, 0.3 mg/mL), sodium phosphate (100 mM), DTT (1  
542 mM), and triethanolamine (80 mM) at pH 7.4. GapN activity was determined as above for  
543 GapA but using NADP<sup>+</sup> (4 mM) instead of NAD<sup>+</sup> as the electron acceptor. To measure the  
544 activity of Ldh, the reaction mixture contained NADH (4 mM), pyruvate (10 mM), and fructose-  
545 1,6-bisphosphate (1 mM) in PBS at pH 7.4. For all three enzymes, each reaction (100 µL)  
546 was initiated by addition of cell-free extracts (10 µL). Absorbance values at 340 nm were  
547 monitored for up to 10 min at 37°C. The initial rates of reaction were normalised to total  
548 protein content as determined using the QuantiPro BCA Assay Kit (Sigma). Control reactions  
549 without any substrate (G3P for GapA and GapN, pyruvate for Ldh) were always performed in  
550 parallel.

551 One unit of activity was defined as follows: 1000 nmol NAD<sup>+</sup> oxidised min<sup>-1</sup> mg  
552 protein<sup>-1</sup> for GapA, 100 nmol NADP<sup>+</sup> oxidised min<sup>-1</sup> mg protein<sup>-1</sup> for GapN, and 1000 nmol  
553 NADH reduced min<sup>-1</sup> mg protein<sup>-1</sup> for Ldh.

554 **GSH levels.** GAS was cultured in 10 – 150 mL of CDM-glucose as required (larger  
555 volumes were required to obtain enough biomass at earlier time points). At the desired time  
556 points, an aliquot was plated for bacterial counting. The remaining cultures were harvested  
557 (5,000 x g, 4°C, 10 min), washed twice with PBS, resuspended in 5-sulfosalicylic acid (5  
558 w/v %), transferred to a tube containing Lysing Matrix B, and frozen at -20°C until further use.  
559 Bacteria were lysed in a bead beater (10 m/s, 30 s, 2 cycles). Cell debris were removed by  
560 centrifugation (20,000 x g, 1 min). Total GSH (and GSSG) levels in lysate supernatants were  
561 determined immediately using the Gor-DTNB recycling method (73) and normalised to total  
562 bacterial counts.

563 **RNA extraction.** GAS was cultured in 2 – 200 mL of CDM-glucose as required  
564 (larger volumes were required to obtain enough biomass at earlier time points). At the desired  
565 time points, cultures were centrifuged (3,000 x g, 4°C, 5 min). Bacterial pellets were  
566 resuspended immediately in 1 mL of RNAPro Solution (MP Biomedicals) and stored at -80°C  
567 until further use. Bacteria were lysed in Lysing Matrix B and total RNA was extracted following

568 the manufacturer's protocol (MP Biomedicals). RNA extracts were treated with RNase-Free  
569 DNase I enzyme (New England Biolabs). Complete removal of gDNA was confirmed by PCR  
570 using gapA-check-F/R primers (Supporting Table 3). gDNA-free RNA was purified using  
571 RNeasy Mini Kit (QIAGEN) and visualised on an agarose gel.

572 **qPCR analyses.** cDNA was generated from 1 µg of RNA using the SuperScript® IV  
573 First-Strand Synthesis System (Invitrogen). qPCR was performed in 10 or 20 µL reactions  
574 using 2 or 5 ng of cDNA as template and 0.4 µM of the appropriate primer pairs (Supporting  
575 Table 3). Each sample was analysed in technical duplicates. Amplicons were detected with  
576 PowerUP SYBR Green (Invitrogen) in a QuantStudio 6 Flex Real-Time PCR System (Applied  
577 Biosystems) or a CFXConnect Real-Time PCR Instrument (Bio-Rad Laboratories).  $C_q$  values  
578 were calculated using LinRegPCR after correcting for amplicon efficiency.  $C_q$  values of  
579 technical duplicates were typically within  $\pm 0.25$  of each other.

580 *holB* and *tufA*, which encode DNA polymerase III and elongation factor Tu,  
581 respectively, were used as reference genes (Supporting Table 3). Their transcription levels  
582 remained constant in all of the experimental conditions tested here. *holB* was used as the  
583 reference gene in all the data presented here because its  $C_q$  values were closer to the  
584 dynamic ranges of *cop* genes, *adcAII*, *cadD*, and *siaA*, but the results were identical with  
585 when *tufA* was used as the reference.

586 **RNA-seq analyses.** GAS  $\Delta copA$  mutant strain was cultured in the presence of 0 or 5  
587 µM of added Cu for  $t = 5$  h ( $n = 3$ ) and RNA was extracted from each culture as described  
588 earlier. RNA-Seq was performed from Ribo-zero (rRNA depleted) triplicate samples on a  
589 single Illumina HiSeq 2500 lane using v4 chemistry from 75 base pair paired-end reads.  
590 Reads were mapped to the 5448 (M1) GAS reference genome (GenBank accession number  
591 CP008776.1) with BWA MEM (version 0.7.16). Relative read counts (per gene) and  
592 differential gene expression was determined using DESeq2 (v. 1.26.0) (74) in R. Genes with  
593 less than 10 reads across all conditions and samples were removed.  $P$ -values were  
594 calculated using Wald test and adjusted for multiple testing using Benjamini-Hochberg/false  
595 discovery rate. Illumina read data were deposited to the European Nucleotide Archive  
596 Sequence Read Archive under the accession numbers ERS1996831, ERS1996835, and  
597 ERS1996839.

598

## 599 **AUTHOR CONTRIBUTIONS**

600           AGM, KJW, KYD, MJW initiated the research. KYD had overall responsibility for the  
601 conceptualisation and coordination of the programme. KYD designed the experiments with  
602 input from KJW. C-LYO, MMZ generated the  $\Delta copA$  and  $copA^+$  mutant strains. KYD, LJS  
603 conducted the *in vitro* experiments. C-LYO, MMZ performed infection assays in neutrophils.  
604 C-LYO, MZ, SB performed mice infection assays. MRD, LM conducted the RNA-seq  
605 analyses. All authors contributed to data analysis. KJW, KYD, LJS wrote the initial  
606 manuscript. All authors reviewed and approved the final version of the manuscript.

607

## 608 **ACKNOWLEDGEMENT**

609           We thank members of the Metals in Biology grouping (Department of Biosciences,  
610 Durham University) for helpful discussions related to this project and Dr Robert Borthwick  
611 (Department of Physics, Durham University) for reviewing the manuscript. Dr Marietjie  
612 Mostert (School of Earth Sciences, The University of Queensland) and Dr Deenah Morton  
613 (Department of Biosciences, Durham University) provided technical assistance with ICP MS.  
614 Dr Amanda Walker and Dr Nadia Keller (School of Chemistry and Molecular Biosciences, The  
615 University of Queensland) assisted with collection of mice tissues. Dr Ian Cummins  
616 (Department of Biosciences, Durham University) provided technical assistance with  
617 measurements of growth media components using mass spectrometry. We acknowledge the  
618 assistance of the sequencing and pathogen informatics core teams at the Wellcome Trust  
619 Sanger Institute.

620

## 621 **FUNDING SOURCES**

622           LJS was funded by a Wellcome Trust Seed Award (214930/Z/18/Z) to KYD. C-LYO  
623 was supported by a Garnett Passe and Rodney Williams Memorial Foundation Research  
624 Fellowship. Preliminary work leading to this study was financially supported by a Royal  
625 Society Research Grant (RSG\1\180044) and a Department of Biosciences (Durham  
626 University) Start-up Funds to KYD. RNA-sequencing was supported by the Wellcome Trust  
627 through the Wellcome Trust Sanger Institute. KJW was supported by a grant from the

628 Biotechnology and Biological Sciences Research Council (BB/S006818/1). This research was  
629 also supported by grants from the National Health and Medical Research Council of Australia  
630 to AGM, MJW, and MRD.

631

## 632 REFERENCES

- 633 1. Poole K. 2017. At the Nexus of Antibiotics and Metals: The Impact of Cu and Zn on  
634 Antibiotic Activity and Resistance. *Trends Microbiol* 25:820–832.
- 635 2. Hao X, Lüthje F, Rønn R, German NA, Li X, Huang F, Kisaka J, Huffman D, Alwathnani  
636 HA, Zhu Y-G, Rensing C. 2016. A role for copper in protozoan grazing – two billion  
637 years selecting for bacterial copper resistance. *Mol Microbiol* 102:628–641.
- 638 3. White C, Lee J, Kambe T, Fritsche K, Petris MJ. 2009. A role for the ATP7A copper-  
639 transporting ATPase in macrophage bactericidal activity. *J Biol Chem* 284:33949–  
640 33956.
- 641 4. Achard MES, Stafford SL, Bokil NJ, Chartres J, Bernhardt PV, Schembri MA, Sweet MJ,  
642 McEwan AG. 2012. Copper redistribution in murine macrophages in response to  
643 *Salmonella* infection. *Biochem J* 444:51–57.
- 644 5. Culbertson EM, Khan AA, Muchenditsi A, Lutsenko S, Sullivan DJ, Petris MJ, Cormack  
645 BP, Culotta VC. 2020. Changes in mammalian copper homeostasis during microbial  
646 infection. *Metallomics* 12:416–426.
- 647 6. Shen Q, Beucler MJ, Ray SC, Rappleye CA. 2018. Macrophage activation by IFN- $\gamma$   
648 triggers restriction of phagosomal copper from intracellular pathogens. *PLoS Pathog*  
649 14:e1007444.
- 650 7. Wolschendorf F, Ackart D, Shrestha TB, Hascall-Dove L, Nolan S, Lamichhane G,  
651 Wang Y, Bossmann SH, Basaraba RJ, Niederweis M. 2011. Copper resistance is  
652 essential for virulence of *Mycobacterium tuberculosis*. *Proc Natl Acad Sci* 108:1621–  
653 1626.
- 654 8. Hyre AN, Kavanagh K, Kock ND, Donati GL, Subashchandrabose S. 2017. Copper Is a  
655 Host Effector Mobilized to Urine during Urinary Tract Infection To Impair Bacterial  
656 Colonization. *Infect Immun* 85.



- 657 9. Subashchandrabose S, Hazen TH, Brumbaugh AR, Himpsl SD, Smith SN, Ernst RD,  
658 Rasko DA, Mobley HLT. 2014. Host-specific induction of *Escherichia coli* fitness genes  
659 during human urinary tract infection. *Proc Natl Acad Sci* 111:18327–18332.
- 660 10. Djoko KY, Ong CY, Walker MJ, McEwan AG. 2015. The Role of Copper and Zinc  
661 Toxicity in Innate Immune Defense against Bacterial Pathogens. *J Biol Chem*  
662 290:18954–18961.
- 663 11. Foster AW, Osman D, Robinson NJ. 2014. Metal preferences and metallation. *J Biol*  
664 *Chem* 289:28095–28103.
- 665 12. Argüello JM, Raimunda D, Padilla-Benavides T. 2013. Mechanisms of copper  
666 homeostasis in bacteria. *Front Cell Infect Microbiol* 3.
- 667 13. Macomber L, Imlay JA. 2009. The iron-sulfur clusters of dehydratases are primary  
668 intracellular targets of copper toxicity. *Proc Natl Acad Sci* 106:8344–8349.
- 669 14. Azzouzi A, Steunou A-S, Durand A, Khalfaoui-Hassani B, Bourbon M-L, Astier C,  
670 Bollivar DW, Ouchane S. 2013. Coproporphyrin III excretion identifies the anaerobic  
671 coproporphyrinogen III oxidase HemN as a copper target in the Cu<sup>+</sup>-ATPase mutant  
672 copA<sup>-</sup> of *Rubrivivax gelatinosus*. *Mol Microbiol* 88:339–351.
- 673 15. Johnson MDL, Kehl-Fie TE, Rosch JW. 2015. Copper intoxication inhibits aerobic  
674 nucleotide synthesis in *Streptococcus pneumoniae*. *Metallomics* 7:786–794.
- 675 16. Djoko KY, Phan M-D, Peters KM, Walker MJ, Schembri MA, McEwan AG. 2017.  
676 Interplay between tolerance mechanisms to copper and acid stress in *Escherichia coli*.  
677 *Proc Natl Acad Sci* 114:6818–6823.
- 678 17. Gold B, Deng H, Bryk R, Vargas D, Eliezer D, Roberts J, Jiang X, Nathan C. 2008.  
679 Identification of a Copper-Binding Metallothionein in Pathogenic *Mycobacteria*. *Nat*  
680 *Chem Biol* 4:609–616.
- 681 18. Straw ML, Chaplin AK, Hough MA, Paps J, Bavro VN, Wilson MT, Vijgenboom E,  
682 Worrall JAR. 2018. A cytosolic copper storage protein provides a second level of copper  
683 tolerance in *Streptomyces lividans*. *Met Integr Biometal Sci* 10:180–193.
- 684 19. Corbett D, Schuler S, Glenn S, Andrew PW, Cavet JS, Roberts IS. 2011. The combined  
685 actions of the copper-responsive repressor CsoR and copper-metallochaperone CopZ



- 686 modulate CopA-mediated copper efflux in the intracellular pathogen *Listeria*  
687 *monocytogenes*. *Mol Microbiol* 81:457–472.
- 688 20. Quintana J, Novoa-Aponte L, Argüello JM. 2017. Copper homeostasis networks in the  
689 bacterium *Pseudomonas aeruginosa*. *J Biol Chem* 292:15691–15704.
- 690 21. Braymer JJ, Giedroc DP. 2014. Recent Developments in Copper and Zinc Homeostasis  
691 in Bacterial Pathogens. *Curr Opin Chem Biol* 0:59–66.
- 692 22. Kershaw CJ, Brown NL, Constantinidou C, Patel MD, Hobman JL. 2005. The  
693 expression profile of *Escherichia coli* K-12 in response to minimal, optimal and excess  
694 copper concentrations. *Microbiology*, 151:1187–1198.
- 695 23. Yamamoto K, Ishihama A. 2005. Transcriptional response of *Escherichia coli* to external  
696 copper. *Mol Microbiol* 56:215–227.
- 697 24. Potter AJ, Trappetti C, Paton JC. 2012. *Streptococcus pneumoniae* Uses Glutathione  
698 To Defend against Oxidative Stress and Metal Ion Toxicity. *J Bacteriol* 194:6248–6254.
- 699 25. Große C, Schleuder G, Schmole C, Nies DH. 2014. Survival of *Escherichia coli* cells on  
700 solid copper surfaces is increased by glutathione. *Appl Environ Microbiol* 80:7071–7078.
- 701 26. Helbig K, Bleuel C, Krauss GJ, Nies DH. 2008. Glutathione and transition-metal  
702 homeostasis in *Escherichia coli*. *J Bacteriol* 190:5431–5438.
- 703 27. Tottey S, Patterson CJ, Banci L, Bertini I, Felli IC, Pavelkova A, Dainty SJ, Pernil R,  
704 Waldron KJ, Foster AW, Robinson NJ. 2012. Cyanobacterial metallochaperone inhibits  
705 deleterious side reactions of copper. *Proc Natl Acad Sci* 109:95–100.
- 706 28. Dainty SJ, Patterson CJ, Waldron KJ, Robinson NJ. 2010. Interaction between  
707 cyanobacterial copper chaperone Atx1 and zinc homeostasis. *J Biol Inorg Chem JBIC*  
708 *Publ Soc Biol Inorg Chem* 15:77–85.
- 709 29. Young CA, Gordon LD, Fang Z, Holder RC, Reid SD. 2015. Copper Tolerance and  
710 Characterization of a Copper-Responsive Operon, *copYAZ*, in an M1T1 Clinical Strain  
711 of *Streptococcus pyogenes*. *J Bacteriol* 197:2580–2592.
- 712 30. Alquethamy SF, Khorvash M, Pederick VG, Whittall JJ, Paton JC, Paulsen IT, Hassan  
713 KA, McDevitt CA, Eijkelkamp BA. 2019. The Role of the CopA Copper Efflux System in  
714 *Acinetobacter baumannii* Virulence. *Int J Mol Sci* 20.

- 715 31. Shafeeq S, Yesilkaya H, Kloosterman TG, Narayanan G, Wandel M, Andrew PW,  
716 Kuipers OP, Morrissey JA. 2011. The cop operon is required for copper homeostasis  
717 and contributes to virulence in *Streptococcus pneumoniae*. *Mol Microbiol* 81:1255–  
718 1270.
- 719 32. Johnson MDL, Kehl-Fie TE, Klein R, Kelly J, Burnham C, Mann B, Rosch JW. 2015.  
720 Role of Copper Efflux in Pneumococcal Pathogenesis and Resistance to Macrophage-  
721 Mediated Immune Clearance. *Infect Immun* 83:1684–1694.
- 722 33. Sun H, Ringdahl U, Homeister JW, Fay WP, Engleberg NC, Yang AY, Rozek LS, Wang  
723 X, Sjöbring U, Ginsburg D. 2004. Plasminogen Is a Critical Host Pathogenicity Factor for  
724 Group A Streptococcal Infection. *Science* 305:1283–1286.
- 725 34. Hirose Y, Yamaguchi M, Okuzaki D, Motooka D, Hamamoto H, Hanada T, Sumitomo T,  
726 Nakata M, Kawabata S. 2019. *Streptococcus pyogenes* Transcriptome Changes in the  
727 Inflammatory Environment of Necrotizing Fasciitis. *Appl Environ Microbiol* 85.
- 728 35. Watson ME, Neely MN. *Animal Models of Streptococcus pyogenes Infection* 33.
- 729 36. Le Breton Y, Mistry P, Valdes KM, Quigley J, Kumar N, Tettelin H, McIver KS. 2013.  
730 Genome-Wide Identification of Genes Required for Fitness of Group A *Streptococcus* in  
731 Human Blood. *Infect Immun* 81:862–875.
- 732 37. Breton YL, Belew AT, Freiberg JA, Sundar GS, Islam E, Lieberman J, Shirtliff ME,  
733 Tettelin H, El-Sayed NM, McIver KS. 2017. Genome-wide discovery of novel M1T1  
734 group A streptococcal determinants important for fitness and virulence during soft-tissue  
735 infection. *PLOS Pathog* 13:e1006584.
- 736 38. Wang H, Wang M, Yang X, Xu X, Hao Q, Yan A, Hu M, Lobinski R, Li H, Sun H. 2019.  
737 Antimicrobial silver targets glyceraldehyde-3-phosphate dehydrogenase in glycolysis of  
738 *E. coli*. *Chem Sci* 10:7193–7199.
- 739 39. Tarrant E, Riboldi GP, R. McIlvin M, Stevenson J, Barwinska-Sendra A, J. Stewart L,  
740 A. Saito M, J. Waldron K. 2019. Copper stress in *Staphylococcus aureus* leads to  
741 adaptive changes in central carbon metabolism. *Metallomics* 11:183–200.
- 742 40. Takahashi S, Abbe K, Yamada T. 1982. Purification of pyruvate formate-lyase from  
743 *Streptococcus mutans* and its regulatory properties. *J Bacteriol* 149:1034–1040.

- 744 41. Brückner R, Titgemeyer F. 2002. Carbon catabolite repression in bacteria: choice of the  
745 carbon source and autoregulatory limitation of sugar utilization. *FEMS Microbiol Lett*  
746 209:141–148.
- 747 42. Ye JJ, Saier MH. 1996. Regulation of sugar uptake via the phosphoenolpyruvate-  
748 dependent phosphotransferase systems in *Bacillus subtilis* and *Lactococcus lactis* is  
749 mediated by ATP-dependent phosphorylation of seryl residue 46 in HPr. *J Bacteriol*  
750 178:3557–3563.
- 751 43. Sanson M, Makthal N, Flores AR, Olsen RJ, Musser JM, Kumaraswami M. 2015.  
752 Adhesin competence repressor (AdcR) from *Streptococcus pyogenes* controls adaptive  
753 responses to zinc limitation and contributes to virulence. *Nucleic Acids Res* 43:418–432.
- 754 44. Do H, Makthal N, Chandrangsu P, Olsen RJ, Helmann JD, Musser JM, Kumaraswami  
755 M. 2019. Metal sensing and regulation of adaptive responses to manganese limitation  
756 by MtsR is critical for group A streptococcus virulence. *Nucleic Acids Res* 47:7476–  
757 7493.
- 758 45. Ye J, Kandegedara A, Martin P, Rosen BP. 2005. Crystal Structure of the  
759 *Staphylococcus aureus* pl258 CadC Cd(II)/Pb(II)/Zn(II)-Responsive Repressor. *J*  
760 *Bacteriol* 187:4214–4221.
- 761 46. Ong CY, Gillen CM, Barnett TC, Walker MJ, McEwan AG. 2014. An Antimicrobial Role  
762 for Zinc in Innate Immune Defense Against Group A *Streptococcus*. *J Infect Dis*  
763 209:1500–1508.
- 764 47. Dennison C, David S, Lee J. 2018. Bacterial copper storage proteins. *J Biol Chem*  
765 293:4616–4627.
- 766 48. Fung DKC, Lau WY, Chan WT, Yan A. 2013. Copper efflux is induced during anaerobic  
767 amino acid limitation in *Escherichia coli* to protect iron-sulfur cluster enzymes and  
768 biogenesis. *J Bacteriol* 195:4556–4568.
- 769 49. Gopal S, Borovok I, Ofer A, Yanku M, Cohen G, Goebel W, Kreft J, Aharonowitz Y.  
770 2005. A multidomain fusion protein in *Listeria monocytogenes* catalyzes the two primary  
771 activities for glutathione biosynthesis. *J Bacteriol* 187:3839–3847.
- 772 50. Vergauwen B, Verstraete K, Senadheera DB, Dansercoer A, Cvitkovitch DG, Guédon E,  
773 Savvides SN. 2013. Molecular and structural basis of glutathione import in Gram-

- 774 positive bacteria via GshT and the cystine ABC importer TcyBC of *Streptococcus*  
775 mutans. Mol Microbiol 89:288–303.
- 776 51. Sherrill C, Fahey RC. 1998. Import and Metabolism of Glutathione by *Streptococcus*  
777 mutans. J Bacteriol 180:1454–1459.
- 778 52. Morgan MT, Nguyen LAH, Hancock HL, Fahrni CJ. 2017. Glutathione limits  
779 aquacopper(I) to sub-femtomolar concentrations through cooperative assembly of a  
780 tetranuclear cluster. J Biol Chem 292:21558–21567.
- 781 53. Osman D, Martini MA, Foster AW, Chen J, Scott AJP, Morton RJ, Steed JW, Lurie-Luke  
782 E, Huggins TG, Lawrence AD, Deery E, Warren MJ, Chivers PT, Robinson NJ. 2019.  
783 Bacterial sensors define intracellular free energies for correct enzyme metalation. 3. Nat  
784 Chem Biol 15:241–249.
- 785 54. Ma Z, Cowart DM, Scott RA, Giedroc DP. 2009. Molecular insights into the metal  
786 selectivity of the Cu(I)-sensing repressor CsoR from *Bacillus subtilis*. Biochemistry  
787 48:3325–3334.
- 788 55. Glauninger H, Zhang Y, A. Higgins K, D. Jacobs A, E. Martin J, Fu Y, H. Jerome Coyne  
789 3rd, E. Bruce K, J. Maroney M, E. Clemmer D, A. Capdevila D, P. Giedroc D. 2018.  
790 Metal-dependent allosteric activation and inhibition on the same molecular scaffold: the  
791 copper sensor CopY from *Streptococcus pneumoniae*. Chem Sci 9:105–118.
- 792 56. Xiao Z, Brose J, Schimo S, Ackland SM, La Fontaine S, Wedd AG. 2011. Unification of  
793 the Copper(I) Binding Affinities of the Metallo-chaperones Atx1, Atox1, and Related  
794 Proteins. J Biol Chem 286:11047–11055.
- 795 57. Cobine P, Wickramasinghe WA, Harrison MD, Weber T, Solioz M, Dameron CT. 1999.  
796 The *Enterococcus hirae* copper chaperone CopZ delivers copper(I) to the CopY  
797 repressor. FEBS Lett 445:27–30.
- 798 58. O'Brien H, Alvin JW, Menghani SV, Doorslaer KV, Johnson MDL. 2019.  
799 Characterization of consensus operator site for *Streptococcus pneumoniae* copper  
800 repressor, CopY. bioRxiv 676700.
- 801 59. Moore CM, Gaballa A, Hui M, Ye RW, Helmann JD. 2005. Genetic and physiological  
802 responses of *Bacillus subtilis* to metal ion stress. Mol Microbiol 57:27–40.

- 803 60. Pontel LB, Scampoli NL, Porwollik S, Checa SK, McClelland M, Soncini FC. 2014.  
804 Identification of a Salmonella ancillary copper detoxification mechanism by a  
805 comparative analysis of the genome-wide transcriptional response to copper and zinc  
806 excess. *Microbiology*, 160:1659–1669.
- 807 61. Foster AW, Pernil R, Patterson CJ, Robinson NJ. 2014. Metal specificity of  
808 cyanobacterial nickel-responsive repressor InrS: cells maintain zinc and copper below  
809 the detection threshold for InrS. *Mol Microbiol* 92:797–812.
- 810 62. L. Kay K, J. Hamilton C, Brun NEL. 2016. Mass spectrometry of *B. subtilis* CopZ: Cu( i )-  
811 binding and interactions with bacillithiol. *Metallomics* 8:709–719.
- 812 63. Newton GL, Rawat M, La Clair JJ, Jothivasan VK, Budiarto T, Hamilton CJ, Claiborne A,  
813 Helmann JD, Fahey RC. 2009. Bacillithiol is an antioxidant thiol produced in Bacilli. *Nat*  
814 *Chem Biol* 5:625–627.
- 815 64. Ma Z, Chandrangsu P, Helmann TC, Romsang A, Gaballa A, Helmann JD. 2014.  
816 Bacillithiol is a major buffer of the labile zinc pool in *Bacillus subtilis*. *Mol Microbiol*  
817 94:756–770.
- 818 65. Speisky H, Gómez M, Carrasco-Pozo C, Pastene E, Lopez-Alarcón C, Olea-Azar C.  
819 2008. Cu(I)–Glutathione complex: A potential source of superoxide radicals generation.  
820 *Bioorg Med Chem* 16:6568–6574.
- 821 66. Hiniker A, Collet J-F, Bardwell JCA. 2005. Copper stress causes an in vivo requirement  
822 for the *Escherichia coli* disulfide isomerase DsbC. *J Biol Chem* 280:33785–33791.
- 823 67. Macomber L, Rensing C, Imlay JA. 2007. Intracellular Copper Does Not Catalyze the  
824 Formation of Oxidative DNA Damage in *Escherichia coli*. *J Bacteriol* 189:1616–1626.
- 825 68. Vaux DL. 2012. Know when your numbers are significant. 7428. *Nature* 492:180–181.
- 826 69. Wasserstein RL, Lazar NA. 2016. The ASA Statement on p-Values: Context, Process,  
827 and Purpose. *Am Stat* 70:129–133.
- 828 70. Le Breton Y, McIver KS. 2013. Genetic Manipulation of *Streptococcus pyogenes* (The  
829 Group A *Streptococcus*, GAS). *Curr Protoc Microbiol* 30:9D.3.1-9D.3.29.
- 830 71. Walker MJ, Hollands A, Sanderson-Smith ML, Cole JN, Kirk JK, Henningham A,  
831 McArthur JD, Dinkla K, Aziz RK, Kansal RG, Simpson AJ, Buchanan JT, Chhatwal GS,

- 832 Kotb M, Nizet V. 2007. DNase Sda1 provides selection pressure for a switch to invasive  
833 group A streptococcal infection. *Nat Med* 13:981–985.
- 834 72. Ong CY, Berking O, Walker MJ, McEwan AG. 2018. New Insights into the Role of Zinc  
835 Acquisition and Zinc Tolerance in Group A Streptococcal Infection. *Infect Immun* 86.
- 836 73. Rahman I, Kode A, Biswas SK. 2006. Assay for quantitative determination of glutathione  
837 and glutathione disulfide levels using enzymatic recycling method. *Nat Protoc* 1:3159–  
838 3165.
- 839 74. Love MI, Huber W, Anders S. 2014. Moderated estimation of fold change and  
840 dispersion for RNA-seq data with DESeq2. *Genome Biol* 15:550.
- 841

1 **Table 1. Cu treatment leads to a misregulation of metal homeostasis.** The GAS  $\Delta copA$  mutant strain was  
 2 cultured with or without 5  $\mu$ M of added Cu for t = 5 h ( $n = 3$ ). Total RNA was extracted, rRNA was depleted,  
 3 cDNA was generated, and finally sequenced by Illumina. Differential gene expression was determined using  
 4 DeSeq2 and presented as the fold-change (FC) of expression in the Cu-treated cultures relative to that in the  
 5 untreated control. Only genes of interest are listed. These are genes regulated by metal-sensing transcriptional  
 6 regulators CopY, CadC<sup>45</sup>, AdcR<sup>43</sup>, MtsR<sup>44</sup>, and GczA<sup>46</sup>, as well as those that encode components of the  
 7 putative GSH uptake system<sup>50</sup>. The complete list of differentially regulated genes is provided in Supporting  
 8 Table 1.

| Gene                  | MGAS5005 gene product annotation                     | log <sub>2</sub> FC<br>(+Cu/-Cu) | P <sub>adj</sub> |
|-----------------------|------------------------------------------------------|----------------------------------|------------------|
| <b>CopY-regulated</b> |                                                      |                                  |                  |
| <i>copZ</i>           | copper chaperone                                     | 4.41                             | 0.0000           |
| <i>copA</i>           | copper-exporting ATPase                              | 4.39                             | 0.0000           |
| <i>copY</i>           | copAB ATPase metal-fist type repressor               | 4.49                             | 0.0000           |
| <b>CadC-regulated</b> |                                                      |                                  |                  |
| <i>cadD</i>           | cadmium resistance protein                           | 3.15                             | 0.0000           |
| <i>cadC</i>           | cadmium efflux system accessory protein              | 4.00                             | 0.0000           |
| <b>AdcR-regulated</b> |                                                      |                                  |                  |
| <i>phtY</i>           | internalin protein                                   | -1.80                            | 0.0000           |
| <i>rpsN</i>           | 30S ribosomal protein S14                            | -1.72                            | 0.0000           |
| <i>phtD</i>           | histidine triad protein                              | -2.51                            | 0.0000           |
| <i>adcAll</i>         | laminin binding protein                              | -2.37                            | 0.0000           |
| <i>adhE</i>           | acetaldehyde-CoA/alcohol dehydrogenase               | -3.32                            | 0.0000           |
| <b>MtsR-regulated</b> |                                                      |                                  |                  |
| <i>fhuG</i>           | ferrichrome transporter permease                     | -1.99                            | 0.0000           |
| <i>fhuB</i>           | ferrichrome transporter permease                     | -1.81                            | 0.0000           |
| <i>fhuD</i>           | ferrichrome-binding protein                          | -1.91                            | 0.0000           |
| <i>fhuA</i>           | ferrichrome ABC transporter ATP-binding protein      | -1.75                            | 0.0000           |
| <i>nrdI.2</i>         | ribonucleotide reductase stimulatory protein         | -1.57                            | 0.0006           |
| <i>nrdE.2</i>         | ribonucleotide-diphosphate reductase subunit alpha   | -1.64                            | 0.0001           |
| <i>hupY</i>           | cell surface protein                                 | -2.29                            | 0.0000           |
| <i>hupZ</i>           | hypothetical protein M5005_Spy_0652                  | -2.25                            | 0.0000           |
| <i>siaD</i>           | ABC transporter ATP-binding protein                  | -2.34                            | 0.0000           |
| <i>siaC</i>           | ferrichrome ABC transporter ATP-binding protein      | -2.71                            | 0.0000           |
| <i>siaB</i>           | ferrichrome transporter permease                     | -2.63                            | 0.0000           |
| <i>siaA</i>           | ferrichrome-binding protein                          | -2.28                            | 0.0000           |
| <i>shp</i>            | heme binding protein                                 | -1.80                            | 0.0000           |
| <i>shr</i>            | Fe <sup>3+</sup> -siderophore transporter            | -1.94                            | 0.0000           |
| <b>GczA-regulated</b> |                                                      |                                  |                  |
| <i>gczA</i>           | TetR family transcriptional regulator                | 0.03                             | 0.9378           |
| <i>czcD</i>           | cobalt-zinc-cadmium resistance protein               | 0.46                             | 0.2807           |
| <b>GSH import</b>     |                                                      |                                  |                  |
| <i>gshT</i>           | amino acid ABC transporter substrate-binding protein | 0.90                             | 0.1098           |
| <i>tcyB</i>           | amino acid ABC transporter permease                  | 0.83                             | 0.0409           |
| <i>tcyC</i>           | ABC transporter substrate-binding protein            | 0.87                             | 0.0443           |

9

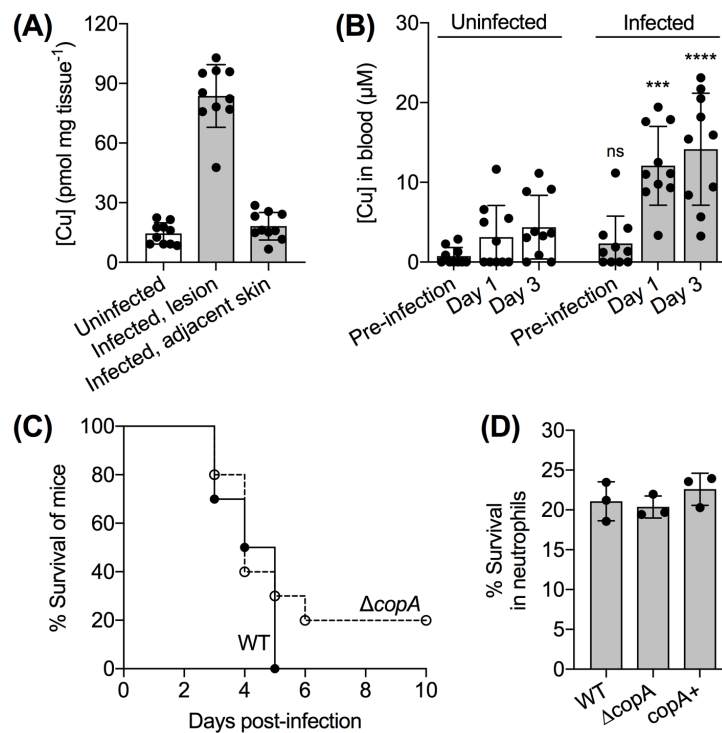

1

2 **Figure 1. Changes in Cu levels during GAS infection and the effect of a *copA* mutation on GAS**

3 **virulence in host infection models. (A) Cu levels in mouse lesions.** Mice were infected subcutaneously

4 with GAS wild type strain or left uninfected ( $n = 10$  each). After 3 days, skin from uninfected mice, and both

5 skin lesions and healthy skin adjacent to the lesions were excised. Total Cu levels were measured by ICP

6 MS and normalised to the weight of the tissues. Cu levels in infected lesions were higher than those in

7 adjacent healthy skin ( $P < 0.0001$ ) or skin from uninfected mice ( $P < 0.0001$ ). **(B) Cu levels in mouse**

8 **blood.** Mice were infected subcutaneously with GAS wild type strain or left uninfected ( $n = 10$  each). Blood

9 was collected and total Cu levels were measured by ICP MS. Values below the detection limit were

10 represented as zero. Cu levels in the blood of infected mice on Days 1 and 3 were higher from those in the

11 blood of uninfected mice ( $***P = 0.0001$ ,  $****P < 0.0001$ ).  $^{ns}P = 0.81$  (vs. uninfected mice). **(C) Virulence in**

12 **an *in vivo* mouse model of infection.** Mice were infected subcutaneously with GAS wild type (WT) or

13  $\Delta copA$  mutant strains ( $n = 10$  each). The number of surviving mice was counted daily up to 10 days post-

14 infection. Differences in survival curves were analysed using the Mann-Whitney test, which found no

15 statistical difference ( $P = 0.099$ ). **(D) Virulence in an *ex vivo* human neutrophil model of infection.**

16 Human neutrophils were infected with GAS wild type (WT),  $\Delta copA$ , or *copA*<sup>+</sup> mutant strains ( $n = 3$  each).

17 Survival of bacteria relative to the input was measured after 2 h. There was no difference between survival of

18 the  $\Delta copA$  mutant when compared with the WT ( $P = 0.87$ ) or *copA*<sup>+</sup> ( $P = 0.35$ ) strains.



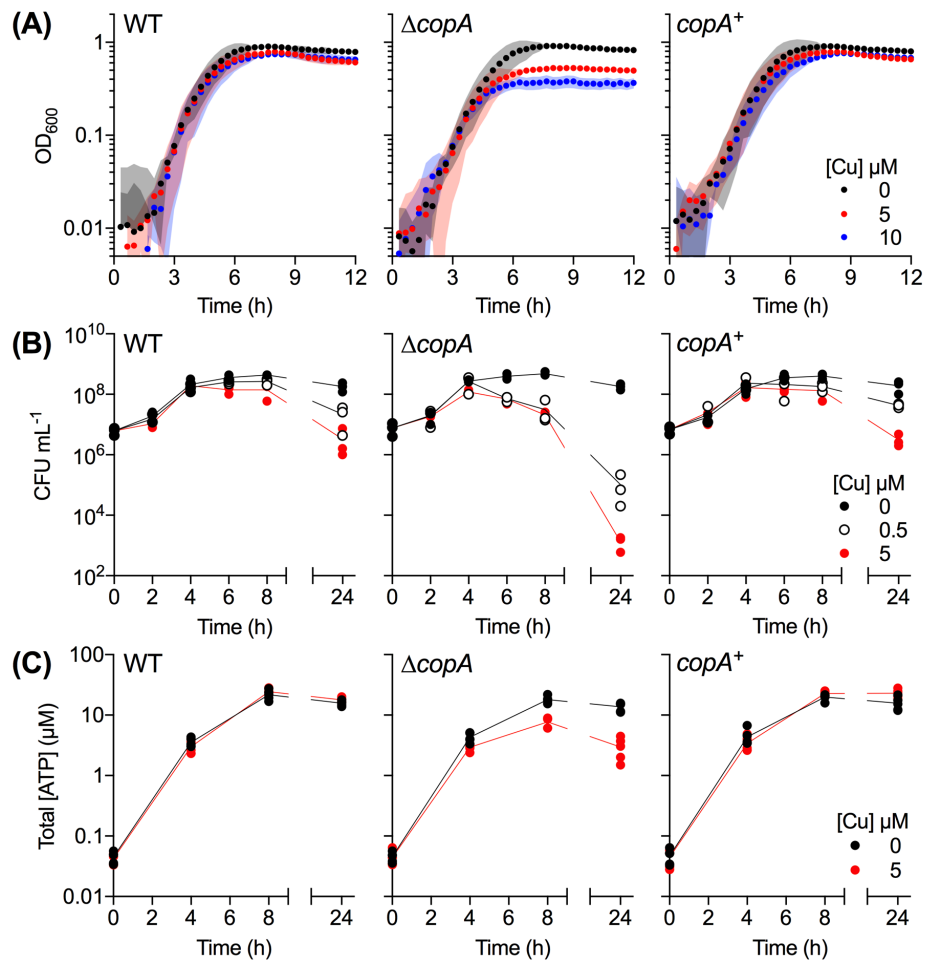

1

2 **Figure 2. Cu-dependent defects in growth and viability.** GAS strains were cultured with added Cu as  
3 indicated. **(A) Growth.** Cultures ( $n = 3$ ) were grown in microtitre plates and OD<sub>600</sub> values were recorded  
4 every 20 min. Cu treatment clearly suppressed growth of  $\Delta copA$  cultures ( $P = 0.034$  for 5  $\mu\text{M}$  Cu,  $P < 0.0001$   
5 for 10  $\mu\text{M}$  Cu). **(B) Plating efficiency.** Cultures ( $n = 3$ ) were plated out at the indicated time points and the  
6 number of colony-forming units (CFU) was enumerated. Cu treatment clearly suppressed plating efficiency of  
7 the  $\Delta copA$  cultures ( $P < 0.0001$  for both 0.5 and 5  $\mu\text{M}$  Cu). **(C) Total ATP levels.** Cultures ( $n = 5$ ) were  
8 sampled at the indicated time points and total ATP levels were determined. Cu treatment clearly suppressed  
9 ATP production in the  $\Delta copA$  cultures ( $P < 0.0001$ ). All statistical analyses were vs. 0  $\mu\text{M}$  Cu.

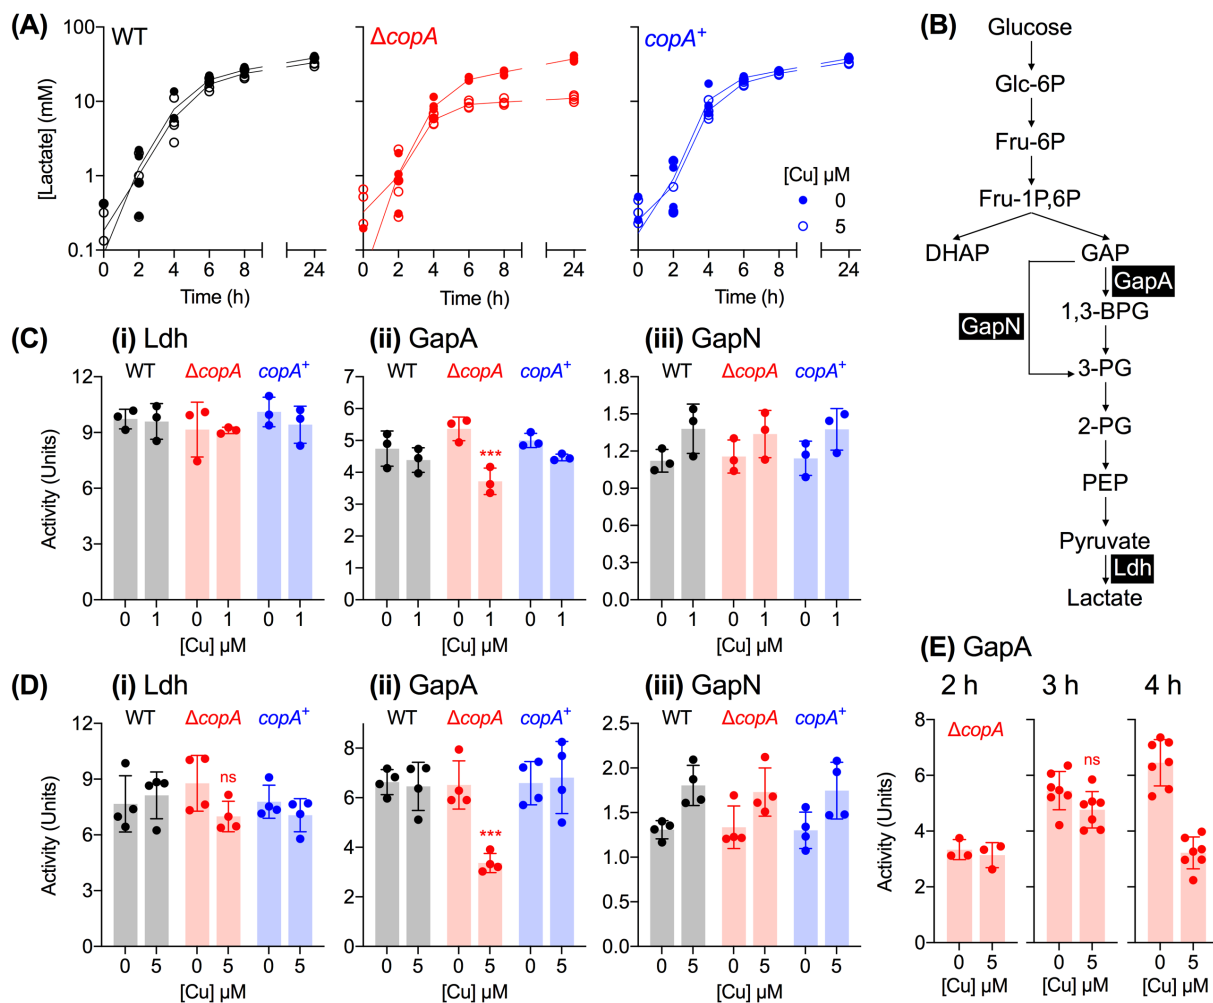

1

2 **Figure 3. Cu-dependent defects in glycolysis and homolactic fermentation. (A) Lactate production.**

3 GAS strains were cultured with added Cu as indicated ( $n = 3$ ). Amounts of lactate secreted to the  
4 extracellular culture medium were measured at the indicated time points. Cu treatment clearly suppressed

5 lactate production in the  $\Delta copA$  cultures ( $P < 0.0001$ ). **(B) Fermentation pathway in GAS.** Enzymes of  
6 interest, namely GapA (NAD<sup>+</sup>-dependent GAPDH, M5005\_SPy\_0233), GapN (NADP<sup>+</sup>-dependent GAPDH,  
7 M5005\_SPy\_1119), and Ldh (lactate dehydrogenase, M5005\_SPy\_0873) are shown. **(C)-(D) Activity of**

8 **glycolytic enzymes (i) Ldh, (ii) GapA, and (iii) GapN.** GAS strains were cultured for  $t = 4$  h with **(C)** 0 or 1  
9  $\mu$ M of added Cu ( $n = 3$ ), or **(D)** 0 or 5  $\mu$ M of added Cu ( $n = 4$ ). Enzyme activities were determined in cell

10 extracts. Cu treatment clearly decreased GapA activity in  $\Delta copA$  cultures ( $***P = 0.0004$ ).  $^{ns}P = 0.14$ . **(E)**

11 **GapA activity over time.** GAS  $\Delta copA$  mutant strain was cultured with added Cu as indicated for  $t = 2$  h ( $n =$   
12 3), 3 h ( $n = 7$ ), or 4 h ( $n = 7$ ). Enzyme activities were determined in cell extracts. Cu treatment did not have  
13 an effect on GapA activity at  $t = 2$  h ( $P = 0.99$ ) or 3 h ( $^{ns}P = 0.18$ ), but it strongly inhibited GapA activity at  $t =$   
14 4 h ( $P < 0.0001$ ). All statistical analyses were vs. 0  $\mu$ M Cu.

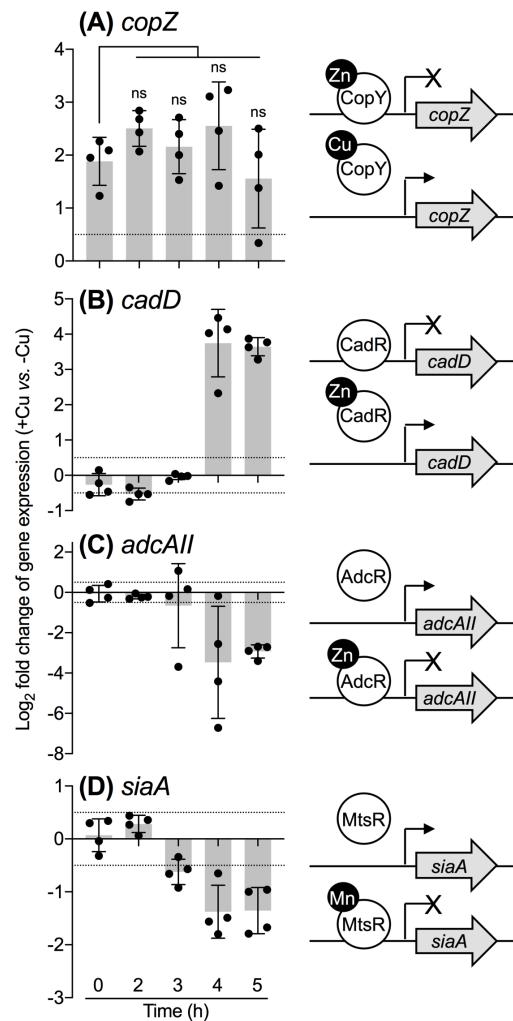

1

2 **Figure 4. Cu-dependent misregulation of metal homeostasis genes.** GAS  $\Delta copA$  mutant strain was  
3 cultured with or without added 0.5  $\mu\text{M}$  Cu for the indicated times ( $n = 4$ ). Transcript levels in Cu-treated  
4 cultures were determined by qPCR and normalised to the corresponding untreated samples that were  
5 cultured for the same time periods. Dotted horizontal lines represent the limit of the assay ( $\log_2\text{FC} = \pm 0.5$ ). A  
6 schematic representation of each gene and its cognate metallosensor is shown. Transcription of *copZ* or  
7 *cadD* is derepressed upon binding of Cu to CopY or Zn (or Cd) to CadR, respectively. Transcription of *adcAll*  
8 or *siaA* is repressed upon binding of Zn to AdcR or Mn (or Fe) to MtsR, respectively. **(A) *copZ*.** Cu treatment  
9 clearly induced *copZ* expression at  $t = 0$  h ( $P = 0.0037$  vs.  $\log_2\text{FC} = 0$ ). This magnitude of induction remained  
10 unchanged over the growth period ( $^{ns}P = 0.53, 0.94, 0.47, 0.90$  for  $t = 2, 3, 4, 5$  h, respectively, vs.  $t = 0$  h).  
11 **(B) *cadD*.** Cu treatment upregulated *cadD* expression at  $t = 4$  and  $5$  h ( $P = 0.0044$  and  $< 0.0001$ ,  
12 respectively, vs.  $\log_2\text{FC} = 0$ ). **(C) *adcAll*.** Cu treatment downregulated *adcAll* expression at  $t = 4$  and  $5$  h ( $P$   
13  $= 0.035$  and  $0.0004$ , respectively, vs.  $\log_2\text{FC} = 0$ ). **(D) *siaA*.** Cu treatment downregulated *siaA* expression at  
14  $t = 3, 4,$  and  $5$  h ( $P = 0.014, 0.012,$  and  $0.084$ , respectively, vs.  $\log_2\text{FC} = 0$ ).

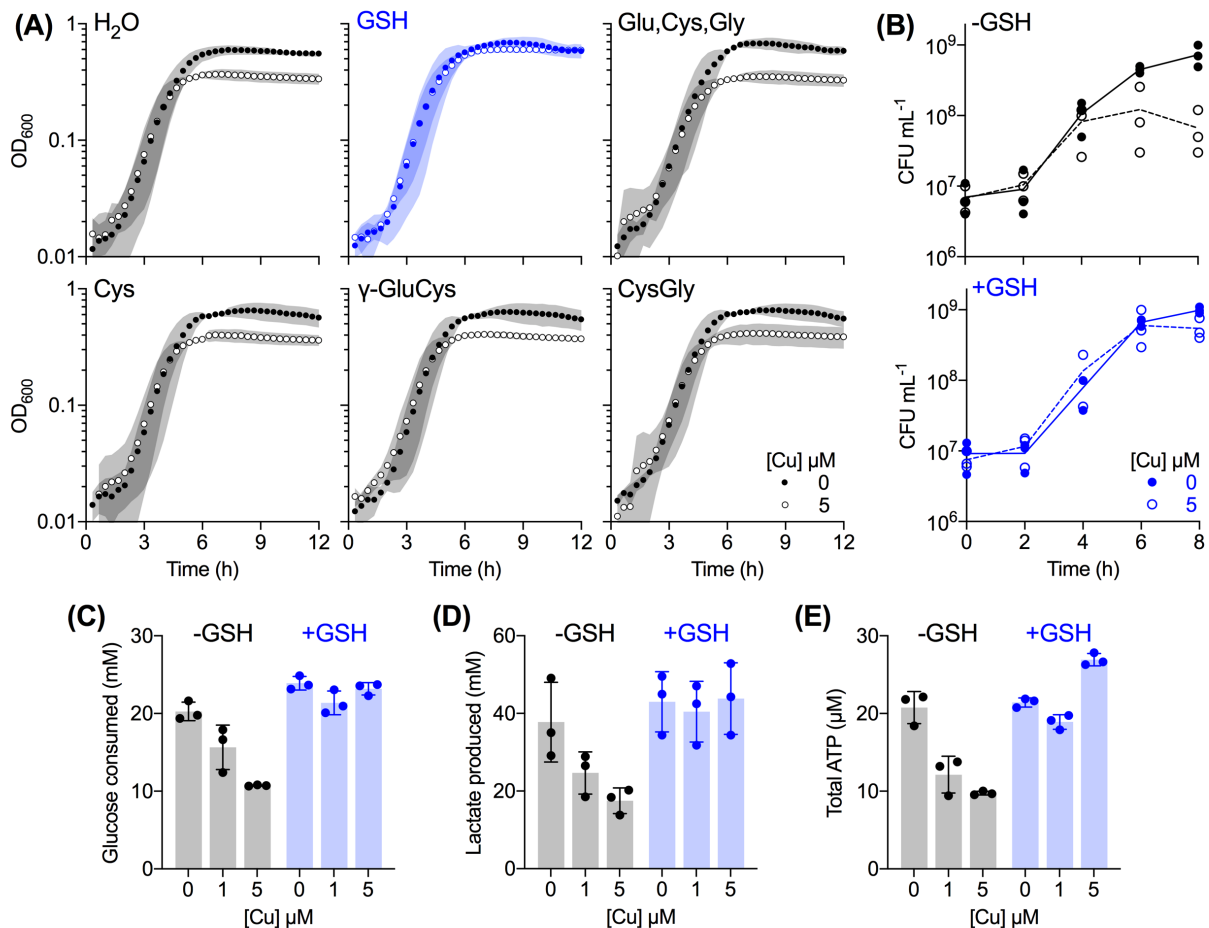

1

2 **Figure 5. Protective effects of supplemental GSH. (A) Growth.** GAS  $\Delta copA$  mutant strain was cultured  
3 with added Cu as indicated ( $n = 3$ ). The culture medium was also supplemented with: water or 0.1 mM each  
4 of GSH (blue); a mixture of Glu, Cys, and Gly; Cys alone; the dipeptide  $\gamma$ -GluCys; or CysGly. Cu treatment  
5 did not affect GSH-supplemented cultures ( $P = 0.99$ ). **(B)-(E)** GAS  $\Delta copA$  mutant strain was grown with  
6 added Cu as indicated, without (black) or with (blue) 0.1 mM GSH ( $n = 3$ ). **(B) Plating efficiency.** Cultures  
7 were plated out at the indicated time points and the numbers of colony-forming units (CFU) were  
8 enumerated. Cu treatment clearly suppressed plating efficiency of GSH-deplete cultures ( $P = 0.0012$ ) but not  
9 that of the GSH-supplemented cultures ( $P = 0.97$ ). **(C) Glucose consumption.** Cultures were sampled at  $t =$   
10 8 h and total amounts of glucose consumed from the extracellular growth media were determined. Cu  
11 treatment clearly suppressed glucose consumption by GSH-deplete cultures ( $P = 0.0053$  for 1  $\mu$ M Cu,  $P <$   
12 0.0001 for 5  $\mu$ M Cu) but not that by GSH-supplemented cultures ( $P = 0.12$  for 1  $\mu$ M Cu,  $P = 0.81$  for 5  $\mu$ M  
13 Cu). **(D) Lactate production.** Cultures were sampled at  $t = 8$  h and amounts of lactate secreted to the  
14 extracellular growth media were determined. Cu treatment clearly suppressed lactate production by GSH-  
15 deplete cultures ( $P = 0.11$  for 1  $\mu$ M Cu,  $P = 0.014$  for 5  $\mu$ M Cu) but not that by GSH-supplemented cultures  
16 ( $P = 0.91$  for 1  $\mu$ M Cu,  $P = 0.99$  for 5  $\mu$ M Cu). **(E) Total ATP levels.** Cultures were sampled at  $t = 8$  h and

## TABLES & FIGURES

- 1 total ATP levels were determined. Cu treatment clearly suppressed ATP production by GSH-deplete cultures
- 2 ( $P < 0.0001$  each for 1 and 5  $\mu\text{M}$  Cu) but not that by the GSH-supplemented cultures ( $P = 0.095$  for 1  $\mu\text{M}$  Cu,
- 3  $P = 0.0008$  for 5  $\mu\text{M}$  Cu). All statistical analyses were vs. 0  $\mu\text{M}$  Cu.

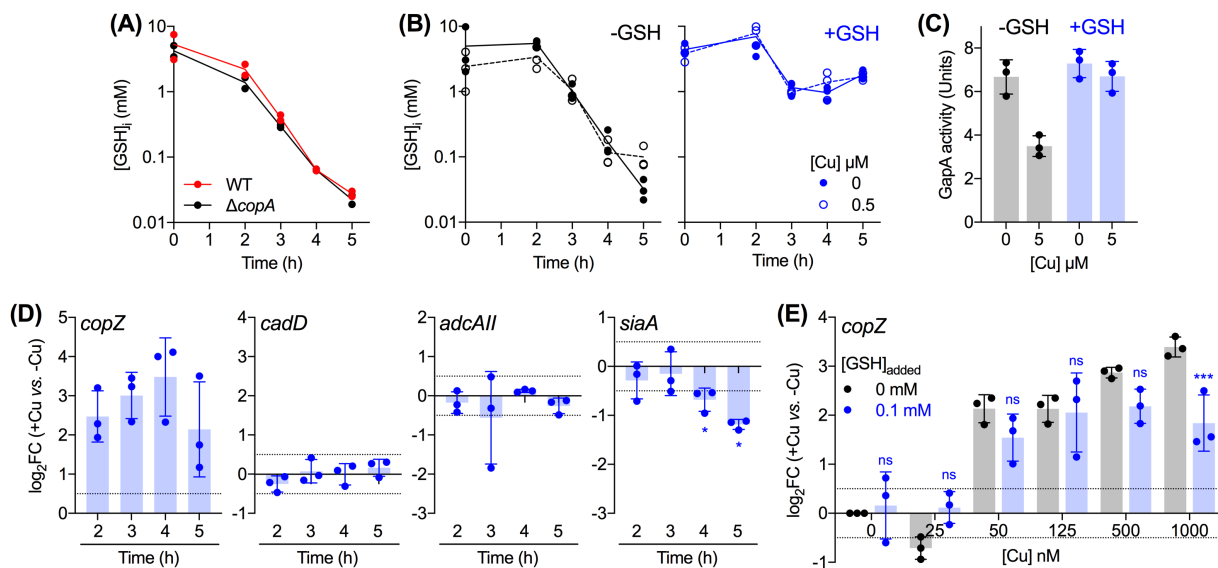

1

2 **Figure 6. Buffering of excess intracellular Cu ions by GSH. (A) Time-dependent changes in**

3 **intracellular GSH concentrations.** GAS strains were cultured without any added Cu or GSH ( $n = 2$ ).

4 Cultures were sampled at the indicated time points and intracellular levels of GSH were measured in cell

5 extracts. There was no clear difference between the intracellular GSH levels of WT and  $\Delta copA$  cultures ( $P =$

6 0.09). **(B)-(E) Effects of GSH supplementation.** GAS  $\Delta copA$  mutant strain was cultured with added Cu as

7 indicated, without (black) or with 0.1 mM of added GSH (blue). **(B) Intracellular GSH concentrations.**

8 Cultures ( $n = 3$ ) were sampled at the indicated time points. Intracellular levels of GSH were measured in cell

9 extracts. Cu treatment did not affect intracellular GSH levels, regardless of GSH supplementation ( $P = 0.95$

10 for 0 mM GSH,  $P = 1.0$  for 0.1 mM GSH). GSH supplementation clearly improved intracellular GSH levels ( $P$

11  $< 0.0001$  for both 0 and 0.5  $\mu$ M Cu), regardless of Cu treatment. **(C) GapA activity.** Cultures ( $n = 3$ ) were

12 harvested at  $t = 4$  h. GapA activity was measured in cell extracts. Cu treatment had a clear effect on GapA

13 activity in GSH-deplete cultures ( $P = 0.0007$ ) but not on GSH-supplemented cultures ( $P = 0.51$ ). **(D)**

14 **Expression of metal homeostasis genes.** GSH-supplemented cultures ( $n = 3$ ) were sampled at the

15 indicated time points. Levels of *copZ*, *cadD*, *adcAll*, and *siaA* transcripts in Cu-treated cultures were

16 determined by qPCR and normalised to the corresponding untreated samples that were harvested at the

17 same time points. Horizontal dotted lines represent the limit of the assay ( $\log_2FC = \pm 0.5$ ). Cu treatment

18 induced *copZ* expression ( $P = 0.023, 0.013, 0.026, 0.093$ ), but not *cadD* ( $P = 0.17, 0.71, 0.98, 0.32$ ), or

19 *adcAll* ( $P = 0.39, 0.50, 0.03, 0.16$ ) at  $t = 2, 3, 4, 5$  h, respectively (vs.  $\log_2FC = 0$ ). Cu treatment continued to

20 downregulate *siaA* expression ( $P = 0.63, 0.03, 0.04, 0.03$  for  $t = 2, 3, 4, 5$  h, respectively, vs.  $\log_2FC = 0$ ). **(E)**

21 **Cu-dependent expression of *copZ*.** Cultures ( $n = 3$ ) were sampled at  $t = 4$  h. Levels of *copZ* transcripts in

22 Cu-treated cultures were normalised to the corresponding untreated samples. Horizontal dotted lines

## TABLES & FIGURES

- 1 represent the limit of the assay ( $\log_2FC = \pm 0.5$ ). GSH supplementation did not affect *copZ* expression at low
- 2 concentrations of added Cu ( $^{ns}P = 0.10, 0.14, 0.48, 1.0, \text{ and } 0.31$  for  $[Cu] = 0, 25, 50, 125, \text{ and } 500$  nM) but it
- 3 did affect expression at 1000 nM of added Cu ( $^{***}P = 0.0009$ ).

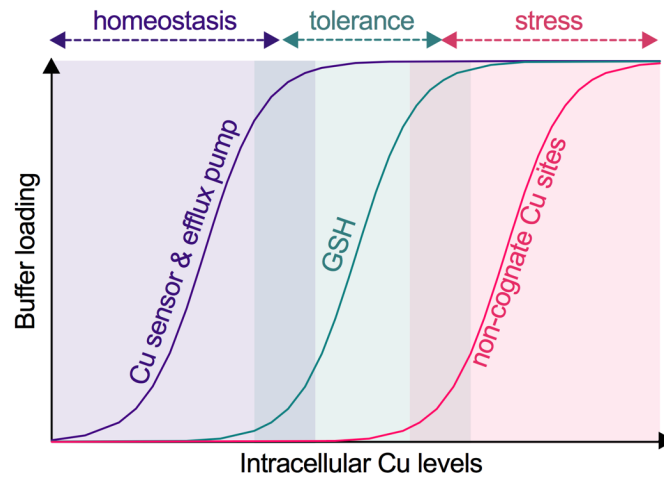

1

2 **Figure 7. Threshold model for bacterial Cu homeostasis, tolerance, and stress.** As Cu levels in the  
3 cytoplasm increase, this metal ion binds to the allosteric site of the Cu-sensing transcriptional regulator,  
4 which subsequently induces expression of the Cu efflux pump. Together, the Cu sensor and efflux pump  
5 impose a low limit of Cu availability and maintain Cu homeostasis. A further rise in cytoplasmic Cu levels  
6 saturates the Cu homeostasis system and begins to fill binding sites in GSH. Since there are no observable  
7 defects in bacterial metabolism or growth at this stage, GSH can be considered to confer Cu tolerance. GSH  
8 depletion or a further increase in cytoplasmic Cu levels saturates this tolerance capacity. Cu now binds to  
9 non-cognate metal-binding sites, leading to inhibition of bacterial metabolism and growth. These conditions  
10 are considered as Cu stress.
